# Supplementary material for: Biochemical aspects of seeds from Cannabis sativa L. plants grown in a mountain environment
Source: Springer Nature journal article supplement (doi:10.1038/s41598-021-83290-1), 2021-02-16
Supplement: MOESM1 [file 41598_2021_83290_MOESM1_ESM.pdf]

## **Biochemical aspects of seeds from *Cannabis sativa* L. plants grown in a mountain environment.**

Chiara Cattaneo<sup>1,\*</sup>, Annalisa Givonetti<sup>1</sup>, Valeria Leoni<sup>2,3</sup>, Nicoletta Guerrieri<sup>4</sup>, Marcello Manfredi<sup>5</sup>, Annamaria Giorgi<sup>2,3</sup>,  
Maria Cavaletto<sup>1</sup>

<sup>1</sup>Università del Piemonte Orientale, Dipartimento di Scienze e Innovazione Tecnologica-DiSIT, Vercelli, 13100, Italy;

<sup>2</sup>Centre of Applied Studies for the Sustainable Management and Protection of Mountain Areas (CRC Ge.S.Di.Mont.), University of Milan, Via Morino 8, 25048 Edolo (BS), Italy;

<sup>3</sup>Department of Agricultural and Environmental Sciences - Production, Landscape, Agroenergy (DISAA), Via Celoria 2, 20133 Milan, Italy;

<sup>4</sup>Water Research Institute-National Research Council (IRSA-CNR), Verbania, Italy;

<sup>5</sup>Università del Piemonte Orientale, Centro di Ricerca Traslazionale sulle Malattie Autoimmuni e Allergiche– CAAD, Novara, 28100, Italy

\*[chiara.cattaneo@uniupo.it](mailto:chiara.cattaneo@uniupo.it)

**Fig S1.** Average air temperature, rainfall and relative humidity of the year 2018, Crodo and Viganella, Italy.

| Crodo |            |               |              |
|-------|------------|---------------|--------------|
|       | Avg T (°C) | Rainfall (mm) | Humidity (%) |
| Jan   | 3,6        | -             | 83           |
| Feb   | 1,4        | -             | 67           |
| Mar   | 5,3        | -             | 71           |
| Apr   | 12,8       | -             | 63           |
| May   | 15,2       | 191,2         | 79           |
| June  | 19,8       | 71,8          | 66           |
| July  | 22,2       | 69,6          | 65           |
| Aug   | 21,2       | 81,8          | 70           |
| Sep   | 18,1       | 23,2          | 72           |
| Oct   | 13,1       | 285,2         | 77           |
| Nov   | 6,9        | 283,6         | 89           |
| Dec   | 4,4        | 33,2          | 70           |

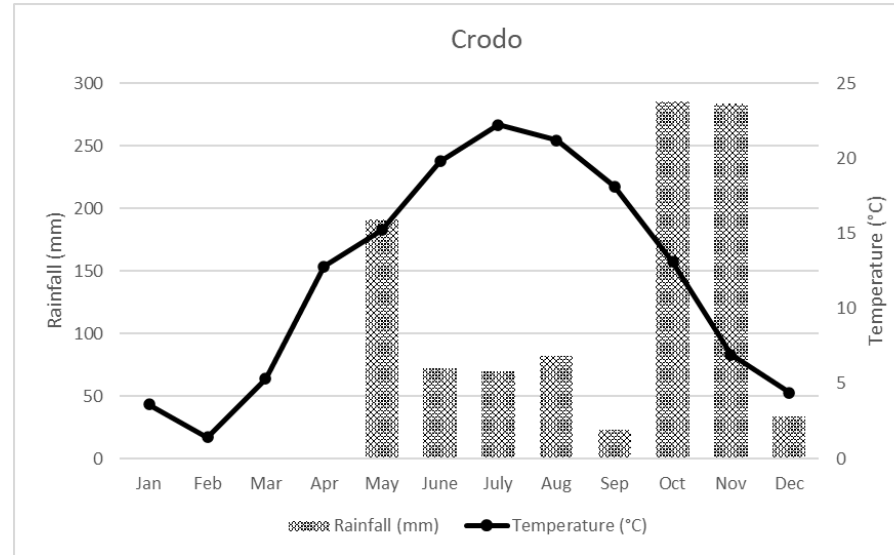

| Viganella (Alpe Cheggio) |            |               |              |
|--------------------------|------------|---------------|--------------|
|                          | Avg T (°C) | Rainfall (mm) | Humidity (%) |
| Jan                      | -          | -             | -            |
| Feb                      | -4,5       | -             | 15           |
| Mar                      | -          | -             | -            |
| Apr                      | 6          | -             | 23           |
| May                      | 9,4        | 306,6         | 32           |
| June                     | 14,2       | 97,8          | 11           |
| July                     | 17         | 94,2          | 26           |
| Aug                      | 16,5       | 155,6         | 25           |
| Sep                      | 13,5       | 60,8          | 11           |
| Oct                      | 8,8        | 350,6         | 26           |
| Nov                      | 2,6        | -             | 33           |
| Dec                      | 1,5        | -             | 12           |

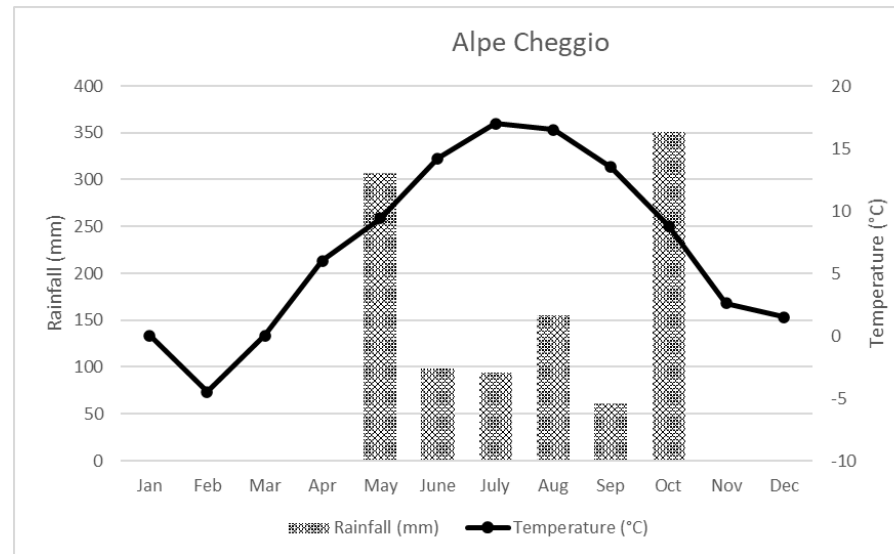

**Fig S2.** Box-plot representing the weight of Finola and Futura 75 seeds from different sources: certified (Cert), Crodo and Viganella.

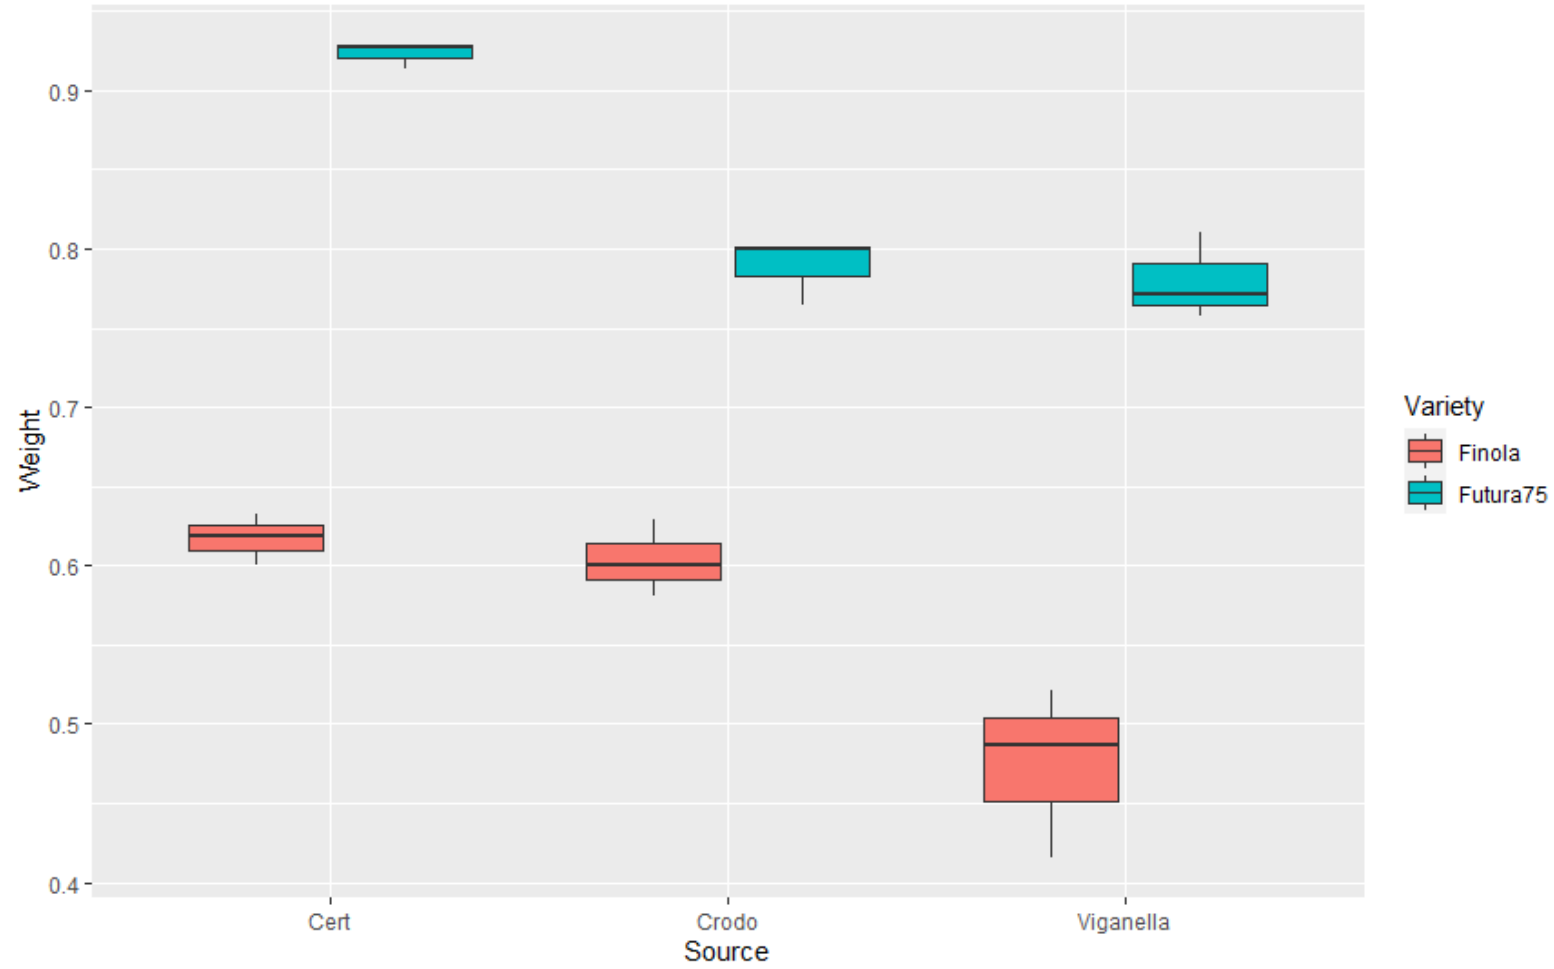

**Fig S3.** Total content and ratio of carotenoids and chlorophylls ( $\mu\text{g/g}$ ) from Finola and Futura 75 certified and harvested seeds from Crodo and Viganella experimental fields. Significant different values ( $P < 0.05$ , Tukey post-hoc test, Bonferroni adjustment) are indicated by different letters.

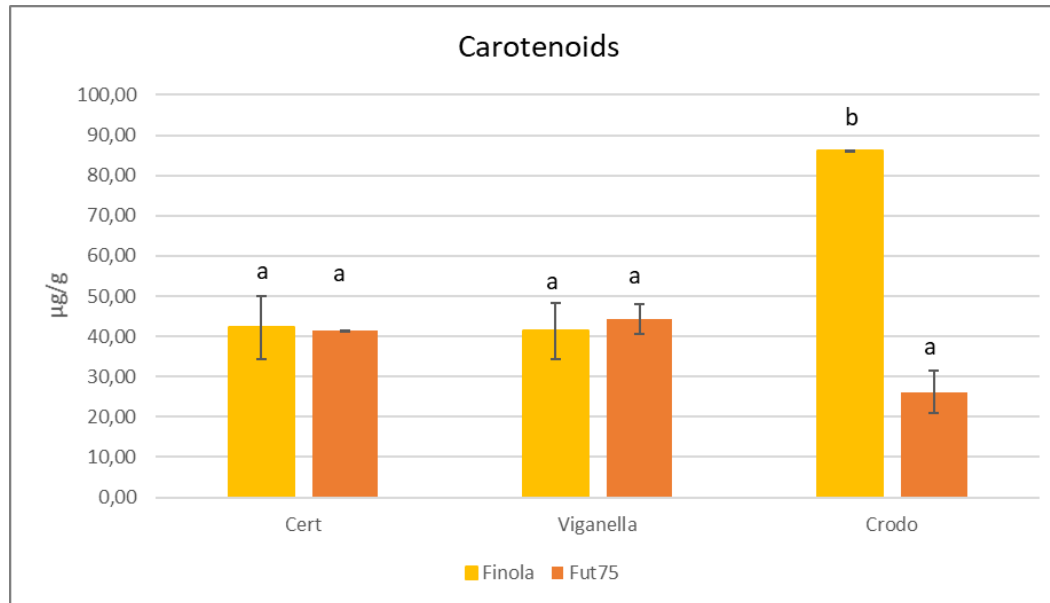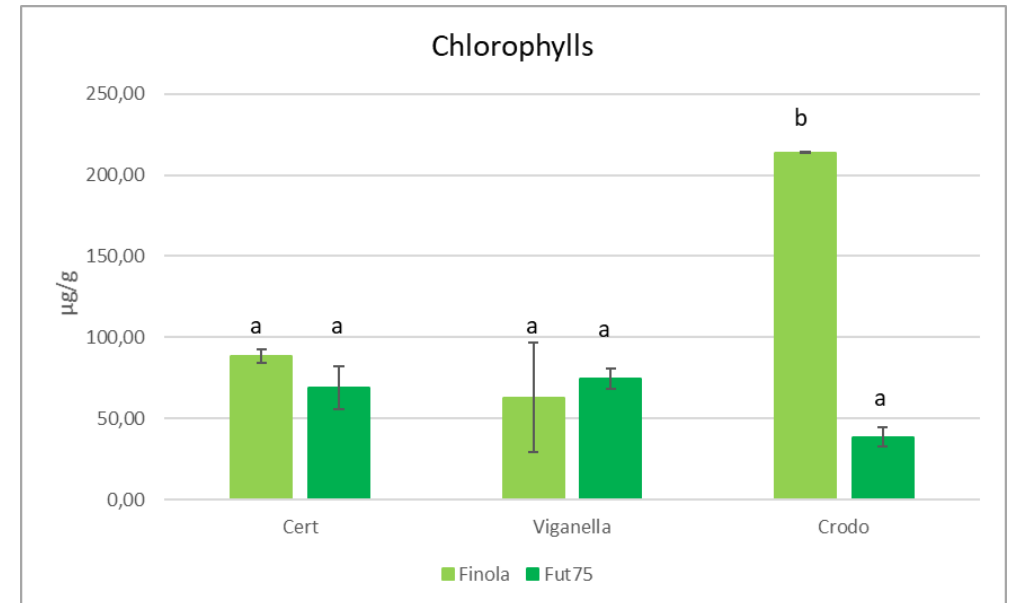

| Hemp variety | Source    | Car/chl ratio |
|--------------|-----------|---------------|
| Futura 75    | Certified | 0,60          |
| Futura 75    | Viganella | 0,59          |
| Futura 75    | Crodo     | 0,68          |
| Finola       | Certified | 0,48          |
| Finola       | Viganella | 0,66          |
| Finola       | Crodo     | 0,40          |

**Fig S4.** SDS-PAGE of the albumin fraction of seeds from Futura 75 (1) and Finola (2) cultivars of *C. sativa* from the experimental fields of Crodo and Viganella, and certified seeds.

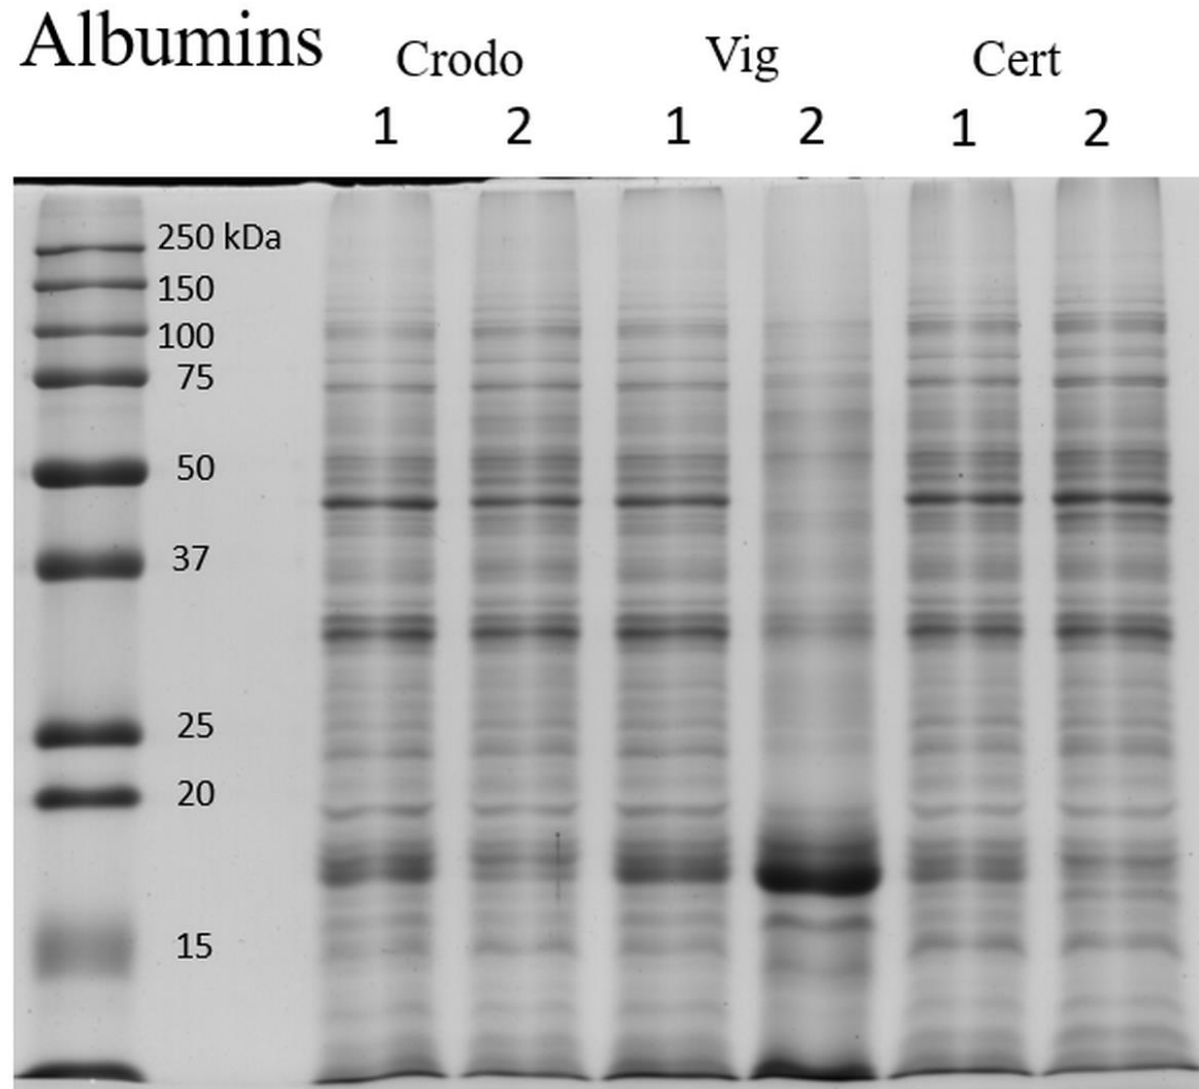

**Fig S5.** SDS-PAGE of the globulin fraction of seeds from Futura 75 (1) and Finola (2) cultivars of *C. sativa* from the experimental fields of Crodo and Viganella, and certified seeds.

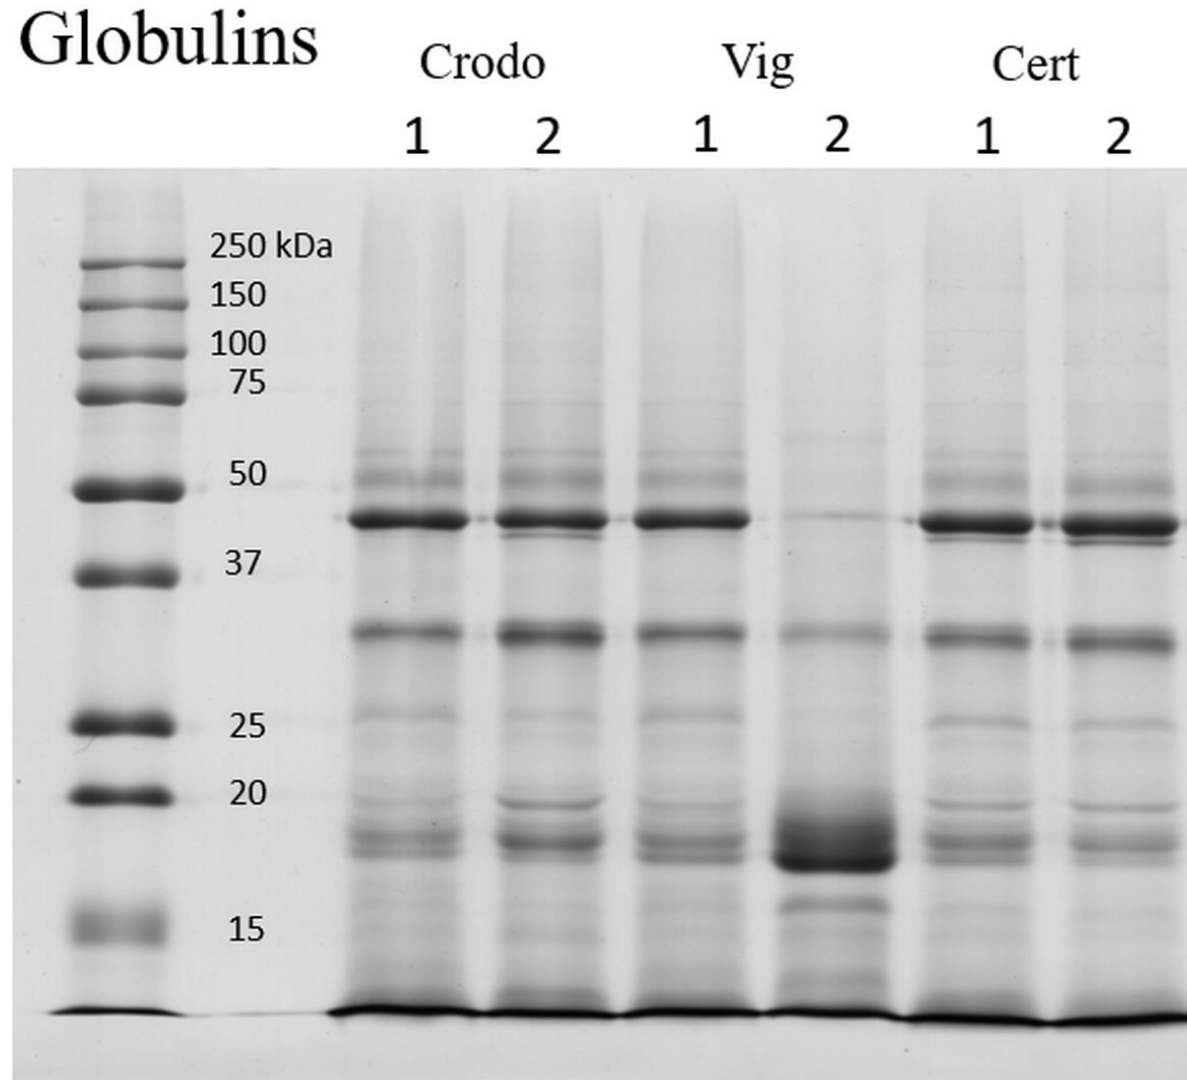

**Fig S6.** SDS-PAGE of the glutelin-like fraction of seeds from Futura 75 (1) and Finola (2) cultivars of *C. sativa* from the experimental fields of Crodo and Viganella, and certified seeds.

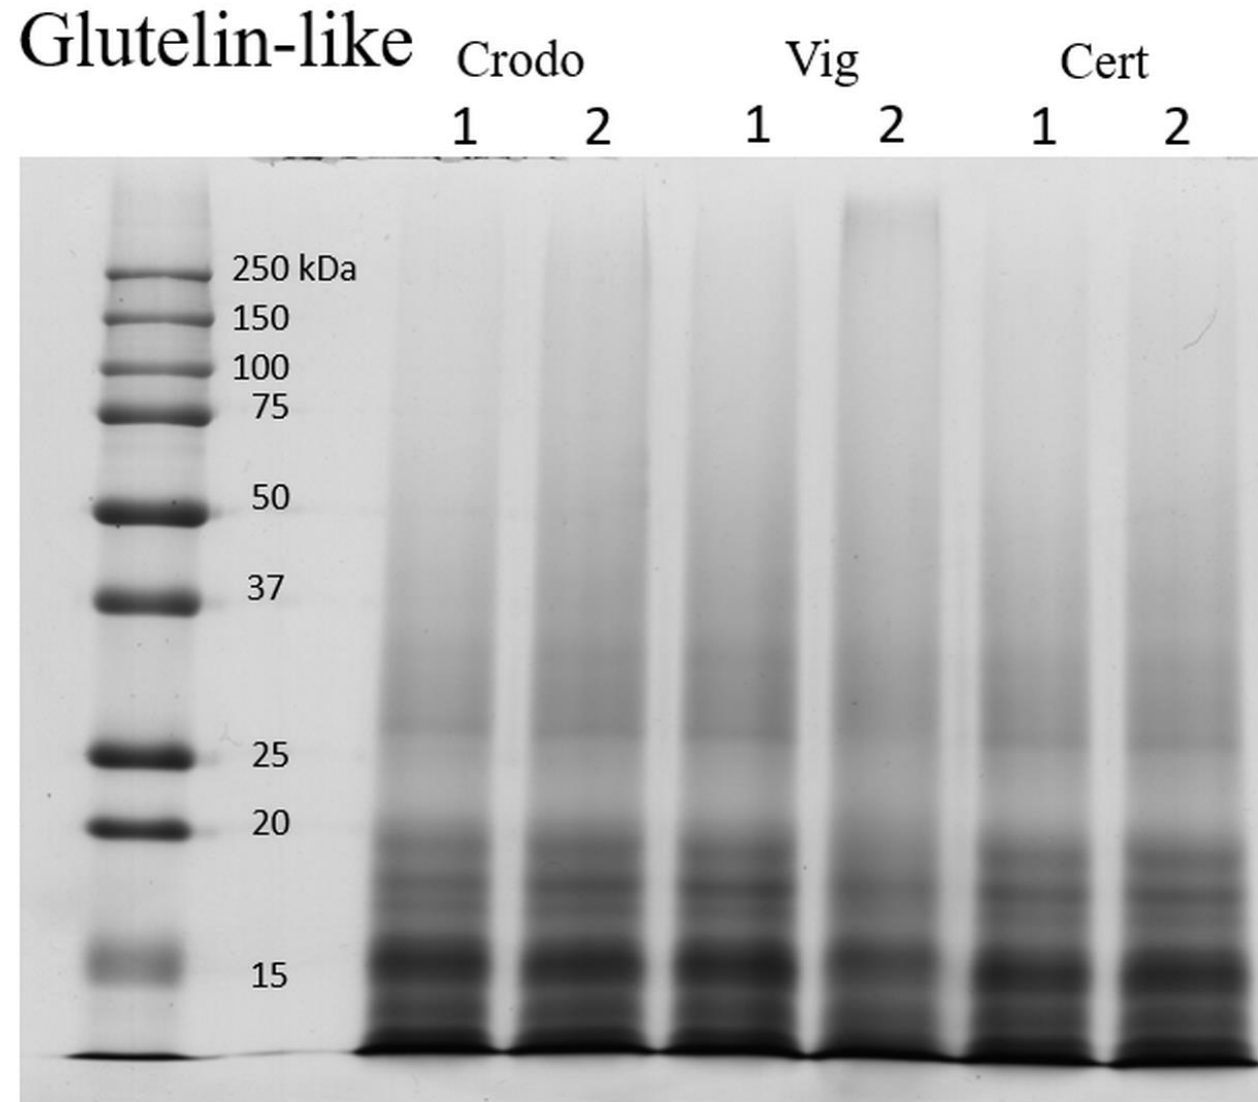

**Fig S7.** Representative 2D gel of total protein extracts from Finola seeds of *Vigna*. Spots showing variations of intensity after PDQuest image analysis are numbered.

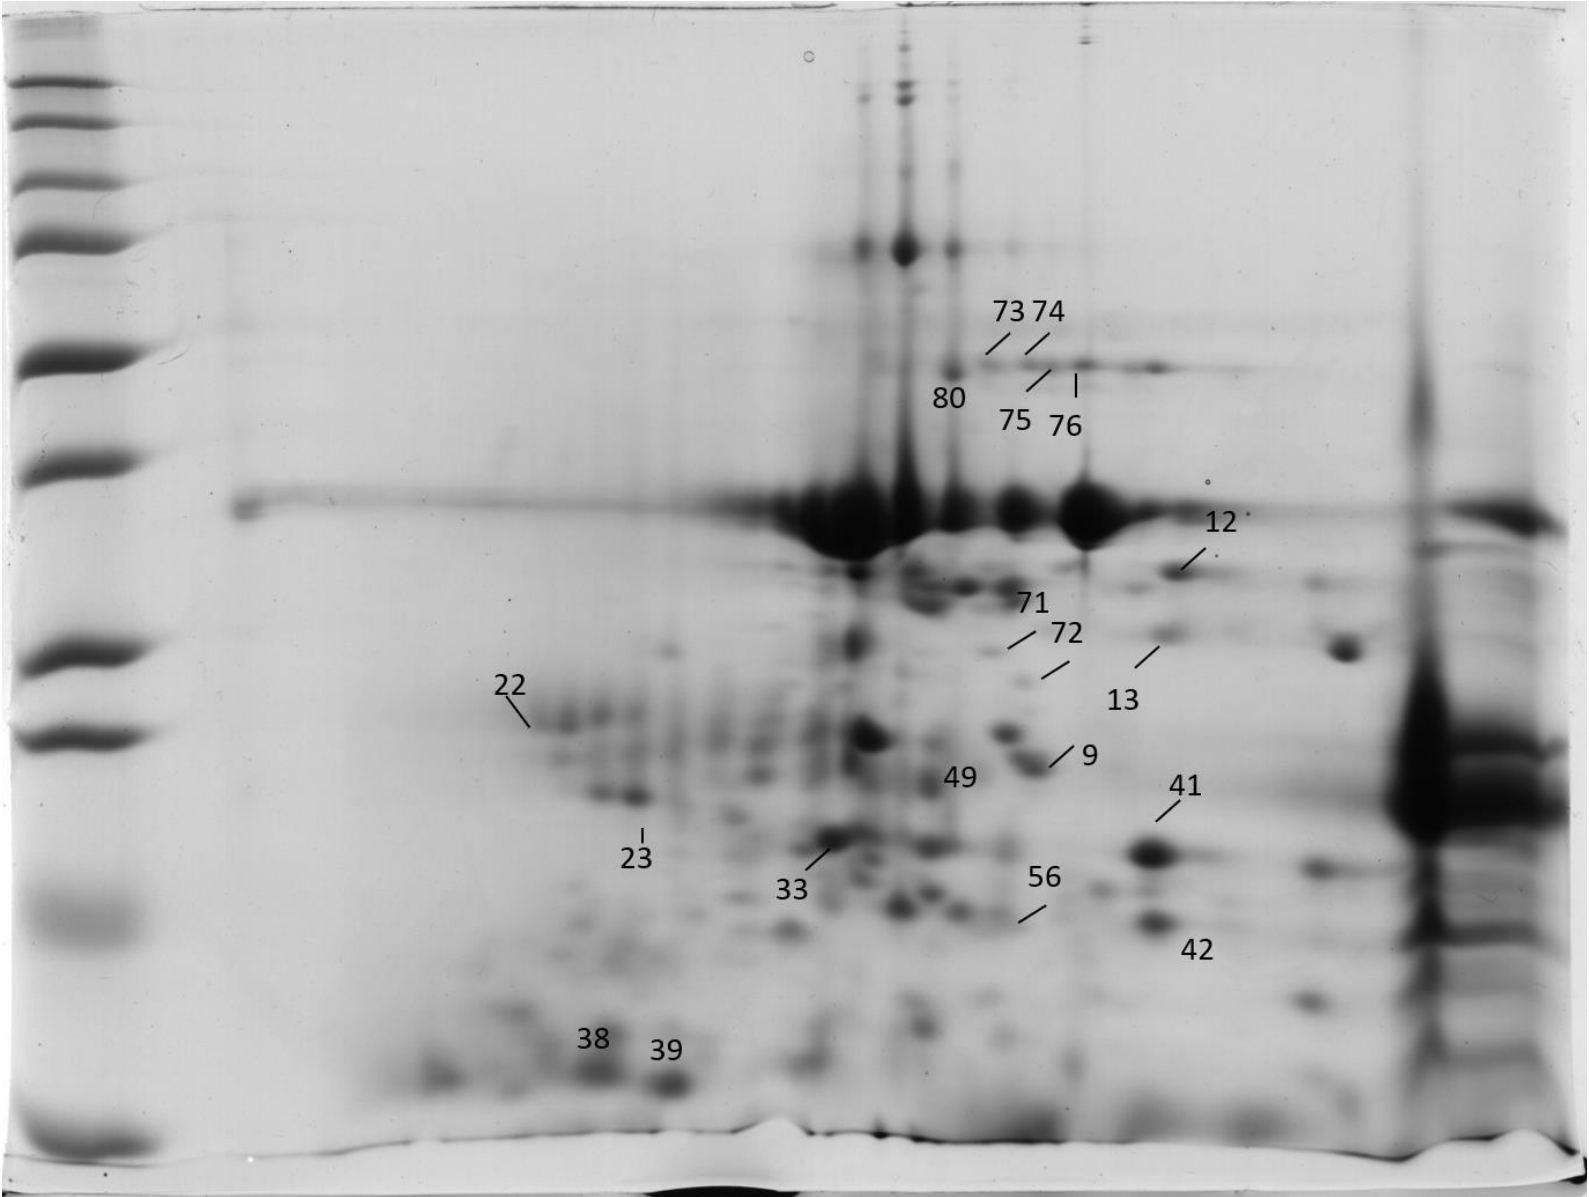

**Table S1.** MS/MS identifications of albumin protein extracts from hemp seeds of Futura75 and Finola analyzed by 2D-PAGE. The spot name (SP), accession code (AC), protein name and organism, number of significant matches (M) and sequences (Seq), peptide sequences, theoretical molecular mass (Mr) and database used for MS/MS search (N: NCBI, S: SwissProt) are indicated. Where available, results of blast analysis are indicated in the “Blast” column.

| SP | AC             | Protein name                                                       | M | Seq | Peptide sequence                     | Mr    | DB | Blast |
|----|----------------|--------------------------------------------------------------------|---|-----|--------------------------------------|-------|----|-------|
| 1  | OAP03364.1     | SRG3 ( <i>Arabidopsis thaliana</i> )                               | 1 | 1   | R.NPALVNKIK.E + Deamidated (NQ)      | 40984 | N  |       |
| 3  | XP_021757355.1 | Phosphoglycerate kinase 3, cytosolic ( <i>Chenopodium quinoa</i> ) | 1 | 1   | K.MANDSVGEEVEK.L                     | 42430 | N  |       |
| 3  | GER33867.1     | Phosphoglycerate kinase ( <i>Striga asiatica</i> )                 | 1 | 1   | R.VDLNVPLDDSLKITDDTR.I               | 42305 | N  |       |
| 3  | KAF4347106.1   | Hypothetical protein G4B88_025149 ( <i>Cannabis sativa</i> )       | 2 | 2   | K.LAELSGK.G<br>K.GVTTIIGGGDSVAAVEK.V | 92335 | N  |       |
| 3  | XP_030508778.1 | ADP-ribosylation factor 1 ( <i>Cannabis sativa</i> )               | 1 | 1   | R.DAVLLVFANK.Q                       | 20624 | N  |       |
| 4  | XP_030485298.1 | Hexokinase-2, chloroplastic ( <i>Cannabis sativa</i> )             | 1 | 1   | K.QLSIDSGILMK.W                      | 54139 | N  |       |
| 5  | XP_030507162.1 | 1-Cys peroxiredoxin ( <i>Cannabis sativa</i> )                     | 1 | 1   | K.DSSGNQVPSR.A                       | 24231 | N  |       |
| 7  | LGUL_ORYSJ     | Lactoylglutathione lyase ( <i>Oryza sativa subsp. japonica</i> )   | 1 | 1   | R.QPGPLPGLNTK                        | 32875 | S  |       |

|    |                                  |                                                                                              |    |   |                                                                                                                                                                                                |                 |   |                                                                                              |
|----|----------------------------------|----------------------------------------------------------------------------------------------|----|---|------------------------------------------------------------------------------------------------------------------------------------------------------------------------------------------------|-----------------|---|----------------------------------------------------------------------------------------------|
| 8  | CDP79027.1                       | Edestin 2 ( <i>Cannabis sativa</i> )                                                         | 6  | 3 | R.GEDLQIIAPSR.I<br>R.SEGASSDEQHQK.V<br>R.ESGEQTPNGNIFSGFDTR.I +<br>Deamidated (NQ)                                                                                                             | 56338           | N |                                                                                              |
| 8  | XP_030506286.1                   | NADPH-dependent<br>aldehyde reductase 1,<br>chloroplastic-like<br>( <i>Cannabis sativa</i> ) | 1  | 1 | K.IALVSGGDSGIGR.A                                                                                                                                                                              | 32167           | N |                                                                                              |
| 11 | RVX02887.1                       | putative ribonuclease H<br>protein<br>( <i>Vitis vinifera</i> )                              | 1  | 1 | R.ALWELVLGL.-                                                                                                                                                                                  | 37231           | N |                                                                                              |
| 13 | XP_030504301.1<br>XP_030506109.1 | 18.5 kDa class I heat shock<br>protein ( <i>Cannabis sativa</i> )                            | 4  | 2 | K.LSEENSAFVNAR.V<br>K.AAMENGVLTVTVPK + Oxidation<br>(M)                                                                                                                                        | 18013<br>17999  | N |                                                                                              |
| 14 | XP_030503293.1                   | 18.5 kDa class I heat shock<br>protein-like ( <i>Cannabis<br/>sativa</i> )                   | 19 | 6 | R.SNILDPFMSMDVWDPFKDFPLSVPD<br>ISK.E + Oxidation (M)<br>K.DFPLSVPDISK.E<br>K.ETSAMVNAR.V + Oxidation (M)<br>K.ADVPLK.K<br>R.VLQISGER.N<br>K.AAMENGVLTVTVPK.E +<br>Deamidated (NQ), Oxidation M | 17486           | N |                                                                                              |
| 15 | XP_030485488.1<br>XP_030488139.1 | 18.1 kDa class I heat shock<br>protein-like ( <i>Cannabis<br/>sativa</i> )                   | 1  | 1 | K.ASMENGVLTVVVPK.E +<br>Deamidated (NQ), Oxidation M                                                                                                                                           | 17886/<br>17852 | N |                                                                                              |
| 16 | HSP11_MEDSA                      | 18.1 kDa class I heat shock<br>protein (Fragment)<br>( <i>Medicago sativa</i> )              | 2  | 2 | R.VLQISGER.N<br>K.AAMENGVLTVTVPK.E +<br>Deamidated (NQ), Oxidation M                                                                                                                           | 17486           | S | XP_030503293.1<br>18.5 kDa class I heat shock<br>protein-like ( <i>Cannabis<br/>sativa</i> ) |

|    |                |                                                                                                                               |   |   |                                                         |       |   |                                                                                                                                                                        |
|----|----------------|-------------------------------------------------------------------------------------------------------------------------------|---|---|---------------------------------------------------------|-------|---|------------------------------------------------------------------------------------------------------------------------------------------------------------------------|
| 16 | TKS00882.1     | NADH dehydrogenase<br>( <i>Populus alba</i> )                                                                                 | 1 | 1 | R.VEAAMVNAR.I + Oxidation (M)                           | 81298 | N |                                                                                                                                                                        |
| 17 | XP_030499617.1 | Glycine-rich RNA-binding<br>protein-like ( <i>Cannabis<br/>sativa</i> )                                                       | 1 | 1 | R.DAIEGMNGQDL DGR.N +<br>Deamidated (NQ); Oxidation (M) | 17128 | N |                                                                                                                                                                        |
| 19 | CDP79023.1     | Edestin 1 ( <i>Cannabis sativa</i> )                                                                                          | 1 | 1 | R.GQGQGSQGSQPDR.H                                       | 58810 | N |                                                                                                                                                                        |
| 20 | CXXS1_ARATH    | Thioredoxin-like protein<br>CXXS1 <i>Arabidopsis<br/>thaliana</i>                                                             | 1 | 1 | K.LVGANPDEIK.K + Deamidated<br>(NQ)                     | 13440 | S | KAF4398011.1<br>hypothetical protein<br>G4B88_019732 ( <i>Cannabis<br/>sativa</i> ),<br>XP_030491271.1<br>thioredoxin-like protein<br>CXXS1 ( <i>Cannabis sativa</i> ) |
| 23 | CXXS1_ARATH    | Thioredoxin-like protein<br>CXXS1 <i>Arabidopsis<br/>thaliana</i>                                                             | 2 | 1 | K.LVGANPDEIK.K + Deamidated<br>(NQ)                     | 13440 | S | KAF4398011.1<br>hypothetical protein<br>G4B88_019732 ( <i>Cannabis<br/>sativa</i> ),<br>XP_030491271.1<br>thioredoxin-like protein<br>CXXS1 ( <i>Cannabis sativa</i> ) |
| 25 | XP_030506286.1 | NADPH-dependent<br>aldehyde reductase 1,<br>chloroplastic-like ( <i>Cannabis<br/>sativa</i> )                                 | 2 | 1 | K.IALVSGGDSGIGR.A                                       | 32167 | N |                                                                                                                                                                        |
| 27 | CAB00000.1     | ribulose-1,5-bisphosphate<br>carboxylase/oxygenase<br>large subunit, partial<br>(chloroplast) ( <i>Caryocar<br/>glabrum</i> ) | 1 | 1 | K.DTDILAAFR.V                                           | 50042 | N |                                                                                                                                                                        |

|    |                |                                                                     |   |   |                                                                                                                                        |       |   |                                                                                                                                                                    |
|----|----------------|---------------------------------------------------------------------|---|---|----------------------------------------------------------------------------------------------------------------------------------------|-------|---|--------------------------------------------------------------------------------------------------------------------------------------------------------------------|
| 27 | CDP79023.1     | edestin 1 ( <i>Cannabis sativa</i> )                                | 1 | 1 | R.GQGQGSQGSQPDRHQK.L + 2<br>Deamidated (NQ)                                                                                            | 58810 | N |                                                                                                                                                                    |
| 28 | CXXS1_ARATH    | Thioredoxin-like protein<br>CXXS1 <i>Arabidopsis thaliana</i>       | 2 | 1 | K.LVGANPDEIK.K + Deamidated<br>(NQ)                                                                                                    | 13440 | S | KAF4398011.1<br>hypothetical protein<br>G4B88_019732 ( <i>Cannabis sativa</i> ),<br>XP_030491271.1<br>thioredoxin-like protein<br>CXXS1 ( <i>Cannabis sativa</i> ) |
| 29 | ABX09991.1     | actin 1, partial ( <i>Ziziphus jujuba</i> )                         | 3 | 1 | K.LCYVALDFEQEMATAASSSSLEK.<br>S<br>K.LCYVALDFEQEMATAASSSSLEK.<br>S + Deamidated<br>(NQ)K.LCYVALDFEQEMATAASSSS<br>LEK.S + Oxidation (M) | 17833 | N |                                                                                                                                                                    |
| 29 | CDP79023.1     | edestin 1 ( <i>Cannabis sativa</i> )                                | 1 | 1 | R.GQGQGSQGSQPDR.H                                                                                                                      | 58810 | N |                                                                                                                                                                    |
| 29 | PNY00005.1     | Tubulin alpha-3 chain-like<br>protein ( <i>Trifolium pratense</i> ) | 1 | 1 | R.FDGAINVDITEFQTNLVPYPR.I                                                                                                              | 50123 | N |                                                                                                                                                                    |
| 29 | AGJ50594.1     | beta-tubulin ( <i>Pericallis cruenta</i> )                          | 2 | 2 | K.NSSYFVEWIPNNVK.S +<br>Deamidated (NQ)<br>K.GHYTEGAELVDSVLDVVR.K                                                                      | 50697 | N |                                                                                                                                                                    |
| 29 | XP_023875501.1 | GTP-binding protein rhoA<br>( <i>Quercus suber</i> )                | 1 | 1 | K.TCLLIVFSK.G                                                                                                                          | 21978 | N |                                                                                                                                                                    |
| 32 | XP_030478962.1 | Heat shock 70 kDa protein-<br>like ( <i>Cannabis sativa</i> )       | 2 | 2 | R.FSDPSVQSDMK.L + Oxidation (M)<br>R.TTPSYVAFTDTER.L                                                                                   | 72426 | N |                                                                                                                                                                    |

|    |                                  |                                                                                                                                                    |   |   |                                                                               |                |   |
|----|----------------------------------|----------------------------------------------------------------------------------------------------------------------------------------------------|---|---|-------------------------------------------------------------------------------|----------------|---|
| 32 | XP_030501851.1<br>XP_030492979.1 | Luminal-binding protein 5 isoform X1 ( <i>Cannabis sativa</i> ) and mediator of RNA polymerase II transcription subunit ( <i>Cannabis sativa</i> ) | 1 | 1 | K.DAGTIAGLNVAR.I                                                              | 73647<br>73541 | N |
| 33 | RUBA_RICCO                       | RuBisCO large subunit-binding protein subunit alpha (Fragment) ( <i>Ricinus communis</i> )                                                         | 2 | 2 | R.VLVTDQK.I<br>K.TNDSAGDGTTTASVLAR.E                                          | 52461          | S |
| 33 | PDI11_ARATH                      | Protein disulfide isomerase-like 1-1 ( <i>Arabidopsis thaliana</i> )                                                                               | 1 | 1 | K.QSGPASAEIK.S                                                                | 55852          | S |
| 38 | XP_030508280.1<br>XP_030508281.1 | vicilin C72-like ( <i>Cannabis sativa</i> )                                                                                                        | 1 | 1 | R.ADVIVVPAGSTVYMTNQDNK.E +<br>Oxidation (M)                                   | 99860<br>84760 | N |
| 47 | HSP11_DAUCA                      | 17.8 kDa class I heat shock protein ( <i>Daucus carota</i> )                                                                                       | 1 | 1 | R.VLQISGER.N                                                                  | 17771          | S |
| 53 | XP_030507162.1                   | 1-Cys peroxiredoxin ( <i>Cannabis sativa</i> )                                                                                                     | 1 | 1 | K.DSSGNQVPSR.A                                                                | 24231          | N |
| 53 | XP_030486208.1                   | glutathione S-transferase DHAR2-like ( <i>Cannabis sativa</i> )                                                                                    | 1 | 1 | K.VSAVDLSLAPK.L                                                               | 23764          | N |
| 54 | XP_030482081.1                   | 11 kDa late embryogenesis abundant protein ( <i>Cannabis sativa</i> )                                                                              | 6 | 2 | K.ESANVAASAK.S<br>R.TTTQDPSGGAPGYGTGGY.-                                      | 15573          | N |
| 54 | SNQ45158.1                       | Edestin 3 ( <i>Cannabis sativa</i> )                                                                                                               | 6 | 4 | R.AKVNQLAGK.V<br>R.ADVFSPQAGR.L<br>R.AMPEDVIANSYQISR.E<br>R.QGQALTVPQNFAVVK.M | 56672          | N |
| 54 | SNQ45160.1                       | Edestin 3 ( <i>Cannabis sativa</i> )                                                                                                               | 7 | 5 | R.ENMGDPAR.A + Oxidation (M)<br>R.AkVNQLAGK.V<br>R.ADVFSPQAGR.L               | 56473          | N |

|    |             |                                                                                   |    |   |                                                                                                                                                                                            |       |   |
|----|-------------|-----------------------------------------------------------------------------------|----|---|--------------------------------------------------------------------------------------------------------------------------------------------------------------------------------------------|-------|---|
|    |             |                                                                                   |    |   | R.AMPEDVIANSYQISR.E<br>R.QGQALTVPQNFAIVK.M                                                                                                                                                 |       |   |
| 54 | CDP79023.1  | Edestin 1 ( <i>Cannabis sativa</i> )                                              | 1  | 1 | K.TNDNAWVSPLAGR.T                                                                                                                                                                          | 58810 | N |
| 54 | CDP79027.1  | Edestin 2 ( <i>Cannabis sativa</i> )                                              | 3  | 1 | R.LQVVDDNGR.N + Deamidated<br>(NQ)                                                                                                                                                         | 56338 | N |
| 54 | CP19D_ARATH | Peptidyl-prolyl cis-trans<br>isomerase CYP19-4<br>( <i>Arabidopsis thaliana</i> ) | 2  | 1 | K.VVIADSGELPL.-                                                                                                                                                                            | 21577 | S |
| 55 | SNQ45160.1  | Edestin 3 ( <i>Cannabis sativa</i> )                                              | 32 | 4 | R.ADVFSPQAGR.L<br>R.QGQALTVPQNFAIVK.M<br>K.MAENEGFEWISFK.T + Oxidation<br>(M) R.AMPEDVIANSYQISR.E                                                                                          | 56473 | N |
| 55 | SNQ45158.1  | Edestin 3 ( <i>Cannabis sativa</i> )                                              | 30 | 3 | R.ADVFSPQAGR.L<br>R.AMPEDVIANSYQISR.E<br>R.QGQALTVPQNFAVVK.M                                                                                                                               | 56080 | N |
| 55 | CDP79023.1  | Edestin 1 ( <i>Cannabis sativa</i> )                                              | 23 | 6 | R.ENIGDPSR.A<br>R.ENIGDPSRADVFTPQAGR.I<br>R.ISTVNSYNLPILR.F<br>R.VQVVNHMGQK.C + Oxidation (M)<br>K.QASSDGF EWVSFK.T<br>K.TNDNAWVSPLAGR.T                                                   | 58810 | N |
| 55 | CDP79028.1  | Edestin 2 ( <i>Cannabis sativa</i> )                                              | 26 | 7 | R.LNTLNLYNLPILR.F<br>R.LQVVDDNGR.N<br>R.LQVVDDNGRNVFDGELR.E +<br>Deamidated (NQ)<br>K.ASAQGF EWIAVK.T<br>K.TNDNAMRNPLAGK.V + Oxidation<br>(M)<br>R.AMPDDVLANAFQISR.E<br>R.DEISVFSPSSQQTR.Y | 56277 | N |

|    |                                          |                                                                                             |   |   |                                                                  |                           |   |
|----|------------------------------------------|---------------------------------------------------------------------------------------------|---|---|------------------------------------------------------------------|---------------------------|---|
| 55 | XP_030494449.1                           | 60S ribosomal protein L12-3-like ( <i>Cannabis sativa</i> )                                 | 3 | 3 | R.VTGGEVGAASSLAPK.I<br>K.VSVVPSAAALVIK.A<br>K.DLQEEISDGDVEIPQD.- | 17893                     | N |
| 56 | SNQ45153.2<br>XP_030504501.1             | 7S vicilin-like protein ( <i>Cannabis sativa</i> )                                          | 1 | 1 | R.IGFITMEPK.T + Oxidation (M)                                    | 56026                     | N |
| 56 | XP_030487452.1                           | Triosephosphate isomerase, chloroplastic ( <i>Cannabis sativa</i> )                         | 1 | 1 | K.NNVSAEVASK.I + Deamidated (NQ)                                 | 34234                     | N |
| 57 | SNQ45153.2<br>XP_030504501.1             | 7S vicilin-like protein ( <i>Cannabis sativa</i> )                                          | 2 | 1 | R.IGFITMEPK.T + Oxidation (M)                                    | 56026                     | N |
| 58 | CDP79023.1,<br>CDP79024.1,<br>CDP79026.1 | Edestin 1 ( <i>Cannabis sativa</i> )                                                        | 1 | 1 | R.GQGQGSQGSQPDR.H                                                | 58810,<br>58829,<br>58740 | N |
| 59 | XP_030479619.1                           | Late embryogenesis abundant protein, group 3-like ( <i>Cannabis sativa</i> )                | 3 | 3 | K.DAITGDGK.-<br>K.ETAQDLSDSAK.G<br>K.QDAGFNTDDITK.R              | 20590                     | N |
| 65 | OVA13829.1                               | Ubiquitin-associated domain/translation elongation factor EF-Ts ( <i>Macleaya cordata</i> ) | 1 | 1 | K.DIELVMTQAGVPR.S + Oxidation (M)                                | 22359                     | N |
| A  | CDP79023.1,<br>CDP79024.1,<br>CDP79026.1 | Edestin 1 ( <i>Cannabis sativa</i> )                                                        | 1 | 1 | R.GQGQGSQGSQPDR.H                                                | 58810,<br>58829,<br>58740 | N |
| B  | CDP79023.1,<br>CDP79024.1,<br>CDP79026.1 | Edestin 1 ( <i>Cannabis sativa</i> )                                                        | 2 | 1 | R.GQGQGSQGSQPDR.H                                                | 58810,<br>58829,<br>58740 | N |
| C  | CDP79023.1,<br>CDP79024.1,<br>CDP79026.1 | Edestin 1 ( <i>Cannabis sativa</i> )                                                        | 6 | 2 | R.GQGQGSQGSQPDR.H<br>R.GQGQGSQGSQPDRHQK.L                        | 58810,<br>58829,<br>58740 | N |
| C  | OAP03364.1                               |                                                                                             | 2 | 1 | R.NPALVNKIK.E + Deamidated (NQ)                                  | 40984                     | N |

|          |                                          |                                                                                                                                                            |   |   |                                                                                                                                                            |                           |        |
|----------|------------------------------------------|------------------------------------------------------------------------------------------------------------------------------------------------------------|---|---|------------------------------------------------------------------------------------------------------------------------------------------------------------|---------------------------|--------|
| <b>D</b> | CDP79023.1,<br>CDP79024.1,<br>CDP79026.1 | Edestin 1 ( <i>Cannabis sativa</i> )                                                                                                                       | 6 | 2 | R.GQGQGSQGSQPDR.H<br>R.GQGQGSQGSQPDRHQK.L                                                                                                                  | 58810,<br>58829,<br>58740 | N      |
| <b>E</b> | CDP79023.1,<br>CDP79024.1,<br>CDP79026.1 | Edestin 1 ( <i>Cannabis sativa</i> )                                                                                                                       | 9 | 5 | R.QQNQCQIDR.I + Deamidated (NQ)<br>R.GQGQGSQGSQPDR.H<br>R.GQGQGSQGSQPDRHQK.L<br>R.FYLAGNPEDEFEQLR.R<br>R.YTIQQNGLHLPSYTNTTPQLVYIVK<br>.G + Deamidated (NQ) | 58810,<br>58829,<br>58740 | N      |
| <b>F</b> | SNQ45158.1                               | Edestin 3 ( <i>Cannabis sativa</i> )                                                                                                                       | 6 | 2 | R.GVLGTLFPGCAETFEEAQVSVGG<br>GR.S<br>R.LTIQPNGLHLPSYTNGPQLIHVIR.<br>G + Deamidated (NQ)                                                                    | 56672                     | N      |
| <b>F</b> | CDP79023.1,<br>CDP79024.1,<br>CDP79026.1 | Edestin 1 ( <i>Cannabis sativa</i> )                                                                                                                       | 5 | 4 | R.GQGQGSQGSQPDR.H<br>R.FYLAGNPEDEFEQLR.R<br>R.FYLAGNPEDEFEQLRR.E<br>R.YTIQQNGLHLPSYTNTTPQLVYIVK<br>.G + Deamidated (NQ)                                    | 58810,<br>58829,<br>58740 | N      |
| <b>F</b> | VAH03463.1<br>HSP7F_ARATH                | Unnamed protein product<br>( <i>Triticum turgidum</i> subsp.<br>Durum)<br>Heat shock 70 kDa protein<br>6, chloroplastic<br>( <i>Arabidopsis thaliana</i> ) | 1 | 1 | K.VTKAVITVPAYFNDSQR.T +<br>Deamidated (NQ)                                                                                                                 | 27644,<br>76575           | N<br>S |
| <b>F</b> | XP_004290029.1                           | PREDICTED: chaperonin<br>CPN60-2, mitochondrial-<br>like ( <i>Fragaria vesca</i> subsp.<br>Vesca)                                                          | 1 | 1 | R.TALVDAASVSSLMTTTEAVVVSL<br>PEK.E                                                                                                                         | 61759                     | N      |
| <b>G</b> | CDP79023.1,<br>CDP79024.1,<br>CDP79026.1 | Edestin 1 ( <i>Cannabis sativa</i> )                                                                                                                       | 1 | 1 | R.GQGQGSQGSQPDR.H                                                                                                                                          | 58810,<br>58829,<br>58740 | N      |
| <b>H</b> | SNQ45158.1                               | Edestin 3 ( <i>Cannabis sativa</i> )                                                                                                                       | 1 | 1 | R.LTIQPNGLHLPSYTNGPQLIHVIR.<br>G + 3 Deamidated (NQ)                                                                                                       | 56672                     | N      |

|          |                                          |                                                                                    |   |   |                                                                      |                           |   |
|----------|------------------------------------------|------------------------------------------------------------------------------------|---|---|----------------------------------------------------------------------|---------------------------|---|
| <b>I</b> | KZN00901.1                               | Hypothetical protein<br>DCAR_009655 ( <i>Daucus carota</i> subsp. <i>Sativus</i> ) | 1 | 1 | R.VPTANVSVVDLTCR.L                                                   | 36278                     | N |
| <b>L</b> | CDP79023.1,<br>CDP79024.1,<br>CDP79026.1 | Edestin 1 ( <i>Cannabis sativa</i> )                                               | 2 | 1 | R.GQGQGSQGSQPDR.H                                                    | 58810,<br>58829,<br>58740 | N |
| <b>M</b> | CDP79023.1,<br>CDP79024.1,<br>CDP79026.1 | Edestin 1 ( <i>Cannabis sativa</i> )                                               | 3 | 2 | R.GQGQGSQGSQPDRHQL<br>R.GQGQGSQGSQPDR.H                              | 58810,<br>58829,<br>58740 | N |
| <b>M</b> | EMS59070.1                               | Histone H4 ( <i>Triticum urartu</i> )                                              | 2 | 2 | R.ISGLIYQETR.G + Deamidated (NQ)<br>K.TVTSMDVVYALK.R + Oxidation (M) | 11418                     | N |
| <b>N</b> | ARF_MAIZE                                | ADP-ribosylation factor 1<br>( <i>Cannabis sativa</i> )                            | 1 | 1 | R.DAVLLVFANK.Q                                                       | 20705                     | S |
| <b>N</b> | CDP79023.1,<br>CDP79024.1,<br>CDP79026.1 | Edestin 1 ( <i>Cannabis sativa</i> )                                               | 2 | 1 | R.GQGQGSQGSQPDR.H                                                    | 58810,<br>58829,<br>58740 | N |
| <b>N</b> | KZN00901.1                               | Hypothetical protein<br>DCAR_009655 ( <i>Daucus carota</i> subsp. <i>Sativus</i> ) | 1 | 1 | R.VPTANVSVVDLTCR.L                                                   | 36278                     | N |
| <b>N</b> | ABX09991.1                               | Actin 1, partial ( <i>Ziziphus jujuba</i> )                                        | 2 | 1 | K.LCYVALDFEQEMATAASSSSLEK.<br>S                                      | 17833                     | N |
| <b>N</b> | XP_022159030.1                           | Uncharacterized protein<br>LOC111025474<br>( <i>Momordica charantia</i> )          | 1 | 1 | K.RAAEAKSVVEAEPR.G                                                   | 31380                     | N |
| <b>N</b> | XP_023875501.1                           | GTP-binding protein rhoA<br>( <i>Quercus suber</i> )                               | 1 | 1 | K.TCLLIVFSK.G                                                        | 21978                     | N |
| <b>R</b> | CDP79027.1                               | Edestin 2 ( <i>Cannabis sativa</i> )                                               | 2 | 1 | R.GLLPSFLNAPMMFYVIQGR.G +<br>2 Oxidation (M)                         | 56338                     | N |

**Table S2.** MS/MS identifications of total protein extracts from hemp seeds of Futura75 and Finola analyzed by SDS-PAGE. Band identificative name (ID), accession code (AC), protein name and organism, number of significant matches (M) and sequences (Seq), peptide sequences and theoretical molecular mass (Mr) are indicated.

| ID | AC             | Description name                               | M  | Seq. | Peptide sequence                                                                                                  | Mr    |
|----|----------------|------------------------------------------------|----|------|-------------------------------------------------------------------------------------------------------------------|-------|
| A1 | CDP79023.1     | edestin 1<br>( <i>Cannabis sativa</i> )        | 3  | 3    | K.TNDNAWVSPLAGR.T<br>R.EETVLLTSSTSSR.R<br>R.GQGQGSQGSQPDR.H                                                       | 58810 |
| A1 | XP_030508280.1 | vicilin C72-like<br>( <i>Cannabis sativa</i> ) | 1  | 1    | R.ADVIVVPAGSTVYMTNQDNK.E<br>+ Oxidation (M)                                                                       | 99860 |
| A2 | CDP79023.1     | edestin 1<br>( <i>Cannabis sativa</i> )        | 2  | 2    | R.GQGQGSQGSQPDR.H + Deamidated (NQ)<br>R.YLEEAFNVDSSEVK.R + Deamidated (NQ)                                       | 58810 |
| A3 | CDP79023.1     | edestin 1<br>( <i>Cannabis sativa</i> )        | 1  | 1    | R.GQGQGSQGSQPDR.H                                                                                                 | 58810 |
| A4 | CDP79023.1     | edestin 1<br>( <i>Cannabis sativa</i> )        | 1  | 1    | R.GQGQGSQGSQPDR.H                                                                                                 | 58810 |
| A5 | CDP79023.1     | edestin 1<br>( <i>Cannabis sativa</i> )        | 1  | 1    | R.GQGQGSQGSQPDR.H                                                                                                 | 58810 |
| A6 | CDP79023.1     | edestin 1<br>( <i>Cannabis sativa</i> )        | 19 | 11   | R.LQGQNDDR + Deamidated (NQ) ;<br>K.GTLDLVSPLR.S;<br>R.QQNQCQIDR.I ;<br>K.TNDNAWVSPLAGR.T ;<br>R.EETVLLTSSTSSR.R; | 58810 |

|           |                |                                                              |    |    |                                                                                                                                                                                                                                                                                             |       |
|-----------|----------------|--------------------------------------------------------------|----|----|---------------------------------------------------------------------------------------------------------------------------------------------------------------------------------------------------------------------------------------------------------------------------------------------|-------|
|           |                |                                                              |    |    | R.GQGQGSQGSQPDR.H ;<br>R.LQGQNDDRNSIIR.V + Deamidated (NQ) ;<br>R.YLEEAFNVDSSETVK.R;<br>R.FYLAGNPEDEFELR.R;<br>R.GILGVTFPGCPETFEEQR.G                                                                                                                                                       |       |
| <b>A6</b> | XP_030478962.1 | Heat shock 70 kDa protein-like<br>( <i>Cannabis sativa</i> ) | 1  | 1  | R.TTPSYVAFTDTER.L<br>K.DAGAISGLNVLR.I                                                                                                                                                                                                                                                       | 72426 |
| <b>A6</b> | CDP79027.1     | Edestin 2<br>( <i>Cannabis sativa</i> )                      | 1  | 1  | R.DEISVFSPSSQQTR.Y                                                                                                                                                                                                                                                                          | 56338 |
| <b>A7</b> | XP_030508280.1 | Vicilin C72-like<br>( <i>Cannabis sativa</i> )               | 48 | 10 | R.TVGFVGNAR.N ;<br>K.LSYFVSQQQEEGR.G + Deamidated (NQ) ;<br>K.FYEVTPEQNK.Q ;<br>K.TTVLVMVVEGTGR.M ;<br>K.LSYFVSQQQEEGR.G ;<br>R.GHESSGPVISLQNQSPR.Y ;<br>R.ADVIVVPAGSTVYMTNQDNK.E ;<br>K.EAQELAFNMQGSEVEQIFNQPK.L ;<br>R.VTAQLSPGDVFIIPAGHPVAVVANNQK.L ;<br>R.LAVLEAQPSTFVAPHHCDADSVLVVTK.G | 99860 |
| <b>A7</b> | XP_030493178.1 | Sucrose-binding protein-like<br>( <i>Cannabis sativa</i> )   | 15 | 6  | K.ELAFSVPAR.E ;<br>R.SSGPFNLFR.D ;<br>K.LINPVSLPGR.F ;<br>K.SQNEEYFFPGPR.S ;<br>R.FEPFYGAGGENPESFYK.A ;<br>R.ETFNLVEGDILNIPAGTPVYIVNR.D                                                                                                                                                     | 55771 |
| <b>A7</b> | CDP79023.1     | Edestin 1<br>( <i>Cannabis sativa</i> )                      | 7  | 5  | K.TNDNAWVSPLAGR.T ;<br>R.GQGQGSQGSQPDR.H ;<br>K.QASSDGFVWVSFK.T ;                                                                                                                                                                                                                           | 58810 |

|           |            |                                                               |    |    |                                                                                                                                                                                                                                                                                                                                                                                                                   |       |
|-----------|------------|---------------------------------------------------------------|----|----|-------------------------------------------------------------------------------------------------------------------------------------------------------------------------------------------------------------------------------------------------------------------------------------------------------------------------------------------------------------------------------------------------------------------|-------|
|           |            |                                                               |    |    | R. YLEEA FNVDSETVK.R + 2 Deamidated (NQ) ;<br>R.GILGVTFPGCPETFEE SQR.G                                                                                                                                                                                                                                                                                                                                            |       |
| <b>A7</b> | AAB01374.1 | Beta-conglycinin<br>storage protein<br>( <i>Glycine max</i> ) | 2  | 2  | R.LQESVIVEISK ;<br>R.FESFFLSSTQAQQSYLQGFSK.N                                                                                                                                                                                                                                                                                                                                                                      | 74565 |
| <b>A8</b> | CDP79028.1 | Edestin 2<br>( <i>Cannabis sativa</i> )                       | 66 | 15 | R.QNIDRPSQADIFNPR.G ; R.GEDLQIIAPSR.I ;<br>R.WSQCQFQR.L ; R.SEGASSDEQH QK.V ;<br>R.VRGEDLQIIAPSR.I ; R.LNTLN NYNLPILR.F ;<br>R.LNTLN NYNLPILR.F + Deamidated (NQ) ;<br>R.DEISVFSPSSQQTR.Y ;<br>R.AMPDDVLANAFQISR.E + Oxidation (M) ;<br>R.ILAESFNVDTELAHK.L ;<br>R.GIHGAVIPGCPETF ER.G ;<br>R.ESGEQTPNGNIFSGFDTR.I ;<br>R.GLLLPSFLNAPMMFYVIQGR.G + 2 Oxidation<br>(M) ;<br>R.VECEAGVSEYWDIQNTEDDELHCAGVETAR.<br>H | 56277 |
| <b>A8</b> | CDP79023.1 | Edestin 1<br>( <i>Cannabis sativa</i> )                       | 20 | 11 | R.QQNQCQIDR.I ;<br>R.FYLAGNPEDEFEQLR.R ;<br>K.TNDNAWVSPLAGR.T ;<br>R.EETVLLTSSTSSR.R ;<br>R.GQGQGSQGSQPDR.H ;<br>K.QASSDGF EWVSFK.T ;<br>R.ISTVNSYNLPILR.F ;<br>R.YLEEA FNVDSETVK.R ;<br>R.FYLAGNPEDEFEQLR.R ;<br>R.GILGVTFPGCPETFEE SQR.G                                                                                                                                                                        | 58810 |
| <b>A8</b> | SNQ45160.1 | Edestin 3<br>( <i>Cannabis sativa</i> )                       | 13 | 7  | K.QQEGLPNNVFR.G ;<br>R.GFSVNLIQEA FNVDSETAR.K ;<br>R.TAVYGDQNECQLNR.L ;<br>R.AMPEDVIANSYQISR.E + Oxidation (M) ;                                                                                                                                                                                                                                                                                                  | 56473 |

|           |                |                                                                  |     |    |                                                                                                                                                                                                                                                                                                                                                                                                                                            |       |
|-----------|----------------|------------------------------------------------------------------|-----|----|--------------------------------------------------------------------------------------------------------------------------------------------------------------------------------------------------------------------------------------------------------------------------------------------------------------------------------------------------------------------------------------------------------------------------------------------|-------|
| <b>A8</b> | XP_004232705.1 | Lactoylglutathione lyase GLX1<br>( <i>Solanum lycopersicum</i> ) | 3   | 3  | R.IEEEEKQQEGLPNNVFR.G ;<br>R.GVLGTLFPGCAETFEEAQVSVGGGR.S<br>K.ITSFLDPDGWK.T ;<br>K.DPDGYLFEIQR.E ;<br>K.GNAYAQAIGTDDVYK.S                                                                                                                                                                                                                                                                                                                  | 32972 |
| <b>A8</b> | XP_030508280.1 | Vicilin C72-like<br>( <i>Cannabis sativa</i> )                   | 1   | 1  | R.ADVIVVPAGSTVYMTNQDNK.E + Oxidation<br>(M)                                                                                                                                                                                                                                                                                                                                                                                                | 99860 |
| <b>A8</b> | XP_030493178.1 | Sucrose-binding protein-like<br>( <i>Cannabis sativa</i> )       | 1   | 1  | R.ETFNLVEGDILNIPAGTPVYIVNR.D                                                                                                                                                                                                                                                                                                                                                                                                               | 55771 |
| <b>A9</b> | SNQ45160.1     | Edestin 3<br>( <i>Cannabis sativa</i> )                          | 168 | 13 | K.IQSQDDFR.G ;<br>R.KIQSQDDFR.G ;<br>K.QQEGLPNNVFR.G ;<br>R.VECEGMIESWNPHEQFQCAGVALLR.L +<br>Oxidation (M) ;<br>R.QGQALTVPQNFAIVK.M ;<br>R.TAVYGDQNECQLNR.L ;;<br>R.AMPEDVIANSYQISR.E + Oxidation (M) ;<br>R.FYIAGNPHEDFPQSR.R ;<br>R.IEEEEKQQEGLPNNVFR.G ;<br>R.GFSVNLIQEAFNVDSETAR.K ;<br>R.GVLGTLFPGCAETFEEAQVSVGGGR.S ;<br>R.LTIQPNGLHLPSYTNQPLIHVIR.G + 2<br>Deamidated (NQ) ;<br>K.EGDIIAIPAGMAYWCNNDGDQPLVTVNLIDV<br>SNHNNQLDLTPR.R | 56473 |
| <b>A9</b> | CDP79023.1     | Edestin 1<br>( <i>Cannabis sativa</i> )                          | 164 | 20 | R.GQGQGSQGSQPDR.H ;<br>K.GTLDLVSPLR.S ;<br>R.QQNQCQIDR.I ;<br>R.VKGTLDLVSPLR.S ;<br>K.TNDNAWVSPLAGR.T ;<br>K.QASSDGFVWVSFK.T ;                                                                                                                                                                                                                                                                                                             | 58810 |

|           |                |                                                                                        |     |    |                                                                                                                                                                                                                                                                                                                                                                                                                                                                                                      |       |
|-----------|----------------|----------------------------------------------------------------------------------------|-----|----|------------------------------------------------------------------------------------------------------------------------------------------------------------------------------------------------------------------------------------------------------------------------------------------------------------------------------------------------------------------------------------------------------------------------------------------------------------------------------------------------------|-------|
|           |                |                                                                                        |     |    | <p>R.ISTVNSYNLPILR.F ;<br/> R.LQGQNDDRNSIIR.V ;<br/> R.ALPEAVLANAFQISR.D ;<br/> R.YLEEAFNVDSQTVKR.L ;<br/> R.FYLAGNPEDEFEQLR.R ;<br/> R.YTIQQNGLHLPSTNTPQLVYIVK.G ;<br/> R.GILGVTFPGCPETFEESQR.G ;<br/> R.EGDIVAIPAGVAYWSYNNGDQQLVFVSLLDTSNVNNQLDDNPR.R ;<br/> R.VEAEAGLIESWNPNNHNFQFCAGVAVVR.Y ;<br/> R.GILGVTFPGCPETFEESQRGQGQGSQGSQPD<br/> R.H + Deamidated (NQ)</p>                                                                                                                              |       |
| <b>A9</b> | CDP79028.1     | Edestin 2<br>( <i>Cannabis sativa</i> )                                                | 107 | 15 | <p>R.FLQLTAER.G;<br/> R.GEDLQIIAPSR.I;<br/> R.WQSQCQFQR.L;<br/> R.SEGASSDEQHQK.V;<br/> R.ESGEQTPNGNIFSGFDTR.I + 2 Deamidated (NQ);<br/> R.VRGEDLQIIAPSR.I;<br/> R.LNTLNYYNLPILR.F;<br/> R.AMPDDVLANAFQISR.E + Oxidation (M);<br/> R.ILAESFNVDTELAHK.L;<br/> R.GIHGAVIPGCPETFER.G;<br/> R.ESGEQTPNGNIFSGFDTR.I;<br/> R.GLLLPSFLNAPMMFYVIQGR.G + 2 Oxidation (M);<br/> R.VECEAGVSEYWDIQNTEDDELHCAGVETAR.H;<br/> K.EGDMVAMPAGVADWVYNNGDSPLVLIAFVDVGNQANQLDQFSR.R + Deamidated (NQ); 2 Oxidation (M)</p> | 56277 |
| <b>A9</b> | XP_030506286.1 | NADPH-dependent aldehyde reductase 1, chloroplastic-like<br>( <i>Cannabis sativa</i> ) | 8   | 3  | <p>K.IALVSGGDSGIGR.A;<br/> R.VNGVAPGPIWTPLIPSSFSEDHTAK.F + Deamidated (NQ);<br/> R.IDILINNAEQYVTSSIEEIDEAR.L</p>                                                                                                                                                                                                                                                                                                                                                                                     | 32167 |

|           |                |                                                                                                      |   |   |                                                                            |       |
|-----------|----------------|------------------------------------------------------------------------------------------------------|---|---|----------------------------------------------------------------------------|-------|
| <b>A9</b> | XP_030477762.1 | Aspartic proteinase A1-like<br>( <i>Cannabis sativa</i> )                                            | 2 | 2 | K.NGKPAAIQYGTGAIAGFFSEDNVK.V +<br>Deamidated (NQ);<br>K.AIVAQYGETIIESLTK.D | 56422 |
| <b>A9</b> | EEF43857.1     | Lactoylglutathione lyase, putative<br>( <i>Ricinus communis</i> )                                    | 5 | 3 | R.QPGPIPGLNTK ;<br>K.ITSFLDPDGWK.T;<br>K.DPDGYIFEIIQR                      | 31641 |
| <b>A9</b> | XP_030495935.1 | LOW QUALITY PROTEIN: 3-oxoacyl-(acyl-carrier-protein) reductase 4-like<br>( <i>Cannabis sativa</i> ) | 2 | 2 | K.NLEGPVVVVTGASR.G;<br>R.IVNIASVVGLVGNAGQANYSAK.A                          | 33383 |
| <b>A9</b> | XP_030508280.1 | Vicilin C72-like<br>( <i>Cannabis sativa</i> )                                                       | 2 | 1 | R.ADVIVVPAGSTVYMTNQDNK.E + Oxidation<br>(M)                                | 99860 |
| <b>A9</b> | XP_030493178.1 | Sucrose-binding protein-like<br>( <i>Cannabis sativa</i> )                                           | 2 | 2 | K.LINPVSLPGR.F<br>R.ETFNLVEGDILNIPAGTPVYIVNR.D +<br>Deamidated (NQ)        | 55771 |
| <b>B1</b> | XP_030508280.1 | Vicilin C72-like<br>( <i>Cannabis sativa</i> )                                                       | 4 | 1 | R.ADVIVVPAGSTVYMTNQDNK.E                                                   | 99860 |
| <b>B1</b> | CDP79023.1     | Edestin 1<br>( <i>Cannabis sativa</i> )                                                              | 2 | 2 | K.TNDNAWVSPLAGR.T;<br>R.GQQGQSQGSQPDR.H                                    | 58810 |

|           |                |                                                |    |    |                                                                                                                                                                                                                                                                                                                                 |       |
|-----------|----------------|------------------------------------------------|----|----|---------------------------------------------------------------------------------------------------------------------------------------------------------------------------------------------------------------------------------------------------------------------------------------------------------------------------------|-------|
| <b>B3</b> | CDP79023.1     | Edestin 1<br>( <i>Cannabis sativa</i> )        | 1  | 1  | R.GQGQGSQGSQPDR.H + Deamidated (NQ)                                                                                                                                                                                                                                                                                             | 58810 |
| <b>B5</b> | CDP79023.1     | Edestin 1<br>( <i>Cannabis sativa</i> )        | 1  | 1  | R.GQGQGSQGSQPDR.H                                                                                                                                                                                                                                                                                                               | 58810 |
| <b>B6</b> | CDP79023.1     | Edestin 1<br>( <i>Cannabis sativa</i> )        | 9  | 4  | R.LQGQNDDR + Deamidated (NQ);<br>K.TNDNAWVSPLAGR.T;<br>R.GQGQGSQGSQPDR.H;<br>R.YLEEAFNVDSSETVK.R + Deamidated (NQ)                                                                                                                                                                                                              | 58810 |
| <b>B7</b> | XP_030508280.1 | Vicilin C72-like<br>( <i>Cannabis sativa</i> ) | 96 | 11 | K.ESLQIVK ;<br>R.TVGFGVNAR.N;<br>R.ADVIVVPAGSTVYMTNQDNK.E + Oxidation<br>(M);<br>K.FYEVTPEQNK.Q;<br>K.TTVLVMVVEGTGR.M;;<br>K.LSYFVSQQQEEGR.G;<br>R.GHESSGPVISLQNQSPR.Y;<br>R.ADVIVVPAGSTVYMTNQDNK.E;<br>K.EAQELAFNMQGSEVEQIFNQPK.L;<br>R.VTAQLSPGDVFIIPAGHPVAVVANNNQK.L;<br>R.ADVIVVPAGSTVYMTNQDNKESLQIVK.L +<br>Oxidation (M); | 99860 |
| <b>B7</b> | CDP79023.1     | Edestin 1<br>( <i>Cannabis sativa</i> )        | 15 | 9  | K.GTLDLVSPLR.S;<br>K.TNDNAWVSPLAGR.T;<br>R.EETVLLTSSSTSSR.R;<br>R.GQGQGSQGSQPDR.H;<br>K.QASSDGFVVSFK.T;                                                                                                                                                                                                                         | 58810 |

|           |                |                                                            |    |    |                                                                                                                                                                                                                                                                                                             |       |
|-----------|----------------|------------------------------------------------------------|----|----|-------------------------------------------------------------------------------------------------------------------------------------------------------------------------------------------------------------------------------------------------------------------------------------------------------------|-------|
|           |                |                                                            |    |    | R.LQGQNDDRNSIIR.V;<br>R.YLEEAFNVDSETVK.R;<br>R.YLEEAFNVDSETVK.R + Deamidated (NQ);<br>R.GILGVTFPGCPETFEEQR.G                                                                                                                                                                                                |       |
| <b>B7</b> | XP_030493178.1 | Sucrose-binding protein-like<br>( <i>Cannabis sativa</i> ) | 15 | 5  | K.ELAFSVPAR.E;<br>R.SSGPFNLFR.D;<br>K.SQNEEYFFPGPR.S;<br>R.FEPFYGAGGENPESFYK.A;<br>R.ETFNLVEGDILNIPAGTPVYIVNR.D<br>R.AMPDDVLANAFQISR.E + Oxidation (M)                                                                                                                                                      | 55771 |
| <b>B7</b> | CDP79028.1     | Edestin 2<br>( <i>Cannabis sativa</i> )                    | 1  | 1  | R.AMPDDVLANAFQISR.E + Oxidation (M)                                                                                                                                                                                                                                                                         | 56277 |
| <b>B8</b> | CDP79028.1     | Edestin 2<br>( <i>Cannabis sativa</i> )                    | 64 | 12 | R.GTSSPSSR.G;<br>R.GEDLQIIAPSR.I;<br>R.WQSQCQFQR.L;<br>R.SEGASSDEQHVK.V;<br>R.VRGEDLQIIAPSR.I;<br>R.AMPDDVLANAFQISR.E + Oxidation (M);<br>R.ILAESFNVDTELAHK.L;<br>R.GIHGAVIPGCPETFER.G;<br>R.ESGEQTPNGNIFSGFDTR.I;<br>R.GLLLPSFLNAPMMFYVIQGR.G + 2 Oxidation (M);<br>R.VECEAGVSEYWDIQNTEDDELHCAGVETAR.<br>H | 56277 |
| <b>B8</b> | CDP79023.1     | Edestin 1<br>( <i>Cannabis sativa</i> )                    | 14 | 8  | K.GTLDLVSPLR.S;<br>R.QQNQCQIDR.I;<br>K.TNDNAWVSPLAGR.T;<br>R.GQGQGSQGSQPDR.H;<br>K.QASSDGFVVSFK.T;<br>R.YLEEAFNVDSETVK.R;<br>R.FYLAGNPEDEFELR.R;<br>R.GILGVTFPGCPETFEEQR.G                                                                                                                                  | 58810 |

|           |                |                                                               |     |    |                                                                                                                                                                                                                                                                                                                                                                  |       |
|-----------|----------------|---------------------------------------------------------------|-----|----|------------------------------------------------------------------------------------------------------------------------------------------------------------------------------------------------------------------------------------------------------------------------------------------------------------------------------------------------------------------|-------|
| <b>B8</b> | SNQ45160.1     | Edestin 3<br>( <i>Cannabis sativa</i> )                       | 9   | 6  | K.QQEGLPNNVFR.G;<br>R.GFSVNLIQEAFNVDSETAR.K;<br>R.TAVYGDQNECQLNR.L;<br>R.GVLGTLFPGCAETFEEAQSVGGGR.S;<br>R.AMPEDVIANSYQISR.E + Oxidation (M);<br>R.IEEEEKQQEGLPNNVFR.G                                                                                                                                                                                            | 56473 |
| <b>B8</b> | XP_030493178.1 | Sucrose-binding<br>protein-like<br>( <i>Cannabis sativa</i> ) | 2   | 1  | R.ETFNLVEGDILNIPAGTPVYIVNR.D                                                                                                                                                                                                                                                                                                                                     | 55771 |
| <b>B8</b> | XP_030508280.1 | Vicilin C72-like<br>( <i>Cannabis sativa</i> )                | 1   | 1  | R.ADVIVVPAGSTVYMTNQDNK.E + Oxidation<br>(M)                                                                                                                                                                                                                                                                                                                      | 99860 |
| <b>B9</b> | SNQ45160.1     | Edestin 3<br>( <i>Cannabis sativa</i> )                       | 97  | 13 | K.IQSQDDFR.G;<br>R.QELQQTER.E;<br>R.KIQSQDDFR.G;<br>K.QQEGLPNNVFR.G;<br>R.TAVYGDQNECQLNR.L;<br>R.AMPEDVIANSYQISR.E + Oxidation (M);<br>R.FYIAGNPHEDFPQSR.R;<br>R.IEEEEKQQEGLPNNVFR.G;<br>R.GFSVNLIQEAFNVDSETAR.K;<br>R.VECEGMIESWNPHEQFQCAGVALLR.L +<br>Deamidated (NQ);<br>R.GVLGTLFPGCAETFEEAQSVGGGR.S;<br>R.LTIQPNGLHLPSYTNGPQLIHVIR.G + 2<br>Deamidated (NQ) | 56473 |
| <b>B9</b> | CDP79023.1     | Edestin 1<br>( <i>Cannabis sativa</i> )                       | 105 | 23 | R.ADVFTPQAGR;<br>K.GTLDLVSPLR.S;<br>R.QQNQCQIDR.I;<br>R.VKGTLDLVSPLR.S;<br>K.TNDNAWVSPLAGR.T;<br>R.EETVLLTSSTSSR.R;<br>R.GQGQGSQGSQPDR.H;<br>K.QASSDGFVVSFK.T;<br>R.ISTVNSYNLPILR.F;<br>R.LQGQNDDRNSIIR.V;                                                                                                                                                       | 55810 |

|           |                |                                                                                              |    |    |                                                                                                                                                                                                                                                                                                                                                                                                                                                |       |
|-----------|----------------|----------------------------------------------------------------------------------------------|----|----|------------------------------------------------------------------------------------------------------------------------------------------------------------------------------------------------------------------------------------------------------------------------------------------------------------------------------------------------------------------------------------------------------------------------------------------------|-------|
|           |                |                                                                                              |    |    | <p>R.ALPEAVLANAFQISR.D;<br/> R.YLEEAFNVDSSETVKR.L ;<br/> R.FYLAGNPEDEFEQLRR.E;<br/> R.RFYLAGNPEDEFEQLR.R;<br/> R.VEAEAGLIESWNPNNHNFQFCAGVAVVR.Y;<br/> R.GILGVTFPGCPETFEESQR.G;<br/> R.GILGVTFPGCPETFEESQRGQGQGSQGSQPD<br/> R.H + 2 Deamidated (NQ);<br/> R.YTIQQNGLHLPSYTNTTPQLVYIVK.G +<br/> Deamidated (NQ);<br/> R.EGDIVAIPAGVAYWSYNNGDQQLVVFVSLDDT<br/> SNVNNQLDDNPR.R</p>                                                                 |       |
| <b>B9</b> | CDP79027.1     | Edestin 2<br>( <i>Cannabis sativa</i> )                                                      | 47 | 14 | <p>R.GEDLQIIAPSR.I;<br/> R.WSQCQFQR.L;<br/> R.RESGEQTPNGNIFSGFDTR.I + Deamidated<br/> (NQ);<br/> R.VRGEDLQIIAPSR.I;<br/> R.LNTLNYYNLPILR.F;<br/> R.ILAESFNVDTELAHK.L;<br/> R.GIHGAVIPGCPETFER.G;<br/> R.QNIDRPSQADIFNPR.G;<br/> R.ESGEQTPNGNIFSGFDTR.I;<br/> R.GLLLPSFLNAPMMFYVIQGR.G + 2 Oxidation<br/> (M);<br/> R.VECEAGVSEYWDIQNTEDDELHCAGVETAR.<br/> H;<br/> K.EGDMVAMPAGVADWVYNNGDSPLVLI AFVD<br/> VGNQANQLDQFSR.R + 2 Oxidation (M)</p> | 56338 |
| <b>B9</b> | XP_030506286.1 | NADPH-dependent<br>aldehyde reductase<br>1, chloroplastic-like<br>( <i>Cannabis sativa</i> ) | 7  | 6  | <p>K.LLDYTATK.G;<br/> K.IALVSGDSDGIGR.A;<br/> R.VVDEVINAYGR.I;<br/> K.EGSCVINTTSVNAYK.G;<br/> R.VNGVAPGPIWTPLIPSSFSEDHTAK.F +<br/> Deamidated (NQ);<br/> R.IDILINNAAEQYVTSSIEEIDEAR.L</p>                                                                                                                                                                                                                                                      | 32167 |

|           |                |                                                                                         |    |   |                                                                                                                                                      |       |
|-----------|----------------|-----------------------------------------------------------------------------------------|----|---|------------------------------------------------------------------------------------------------------------------------------------------------------|-------|
| <b>B9</b> | XP_006348126.1 | Lactoylglutathione lyase GLX1<br>( <i>Solanum lycopersicum</i> )                        | 4  | 3 | K.ITSFLDPDGWK.T;<br>K.DPDGYLFEIQR.E;<br>K.GNAYAQAIGTDDVYK.S                                                                                          | 32953 |
| <b>B9</b> | XP_030508280.1 | Vicilin C72-like<br>( <i>Cannabis sativa</i> )                                          | 1  | 1 | R.ADVIVVPAGSTVYMTNQDNK.E + Oxidation<br>(M)                                                                                                          | 99860 |
| <b>B9</b> | XP_030481474.1 | Mitochondrial outer membrane protein porin of 34 kDa-like<br>( <i>Cannabis sativa</i> ) | 1  | 1 | K.SFFTISGDVDTK.A                                                                                                                                     | 29450 |
| <b>C1</b> | XP_030508280.1 | Vicilin C72-like<br>( <i>Cannabis sativa</i> )                                          | 15 | 6 | R.TVGFVGNAR.N;<br>K.FYEVTPEQNK.Q;<br>R.RGEQEEESQSGK.I + Deamidated (NQ);<br>K.LSYFVSQQQEEGR.G;<br>R.GHESSGPVISLQNQSPR.Y;<br>R.ADVIVVPAGSTVYMTNQDNK.E | 99860 |
| <b>C1</b> | PNY00005.1     | Tubulin alpha-3 chain-like protein<br>( <i>Trifolium pratense</i> )                     | 5  | 4 | R.TVQFVDWCPTGFK.C;<br>R.AVFVDLEPTVIDEVR + Deamidated (NQ);<br>R.AFVHWYVGEGMEEGEFSEAR.E;<br>R.FDGAINVDITEFQTNLVPYPR.I                                 | 50123 |
| <b>C1</b> | GAX73914.1     | Hypothetical protein CEUSTIGMA_g136<br>4.t1<br>( <i>Chlamydomonas eustigma</i> )        | 2  | 2 | K.FWEVLSDEHGIDPTGTYHGSDLQLER.I;<br>K.NSSYFVEWIPNNVK.A + Deamidated (NQ)                                                                              | 84690 |
| <b>C1</b> | CDP79023.1     | Edestin 1<br>( <i>Cannabis sativa</i> )                                                 | 1  | 1 | R.GQGQGQSQGSQPDR.H                                                                                                                                   | 58810 |

|           |                |                                                            |    |   |                                                                                                                                                                                                    |       |
|-----------|----------------|------------------------------------------------------------|----|---|----------------------------------------------------------------------------------------------------------------------------------------------------------------------------------------------------|-------|
| <b>C1</b> | XP_030508778.1 | ADP-ribosylation factor 1<br>( <i>Cannabis sativa</i> )    | 4  | 3 | R.DAVVLVFANK.Q ;<br>K.NISFTVWDVGGQDK.I;<br>K.LGEIVTTIPTIGFNVETVEYK.N                                                                                                                               | 20624 |
| <b>C1</b> | XP_030493178.1 | Sucrose-binding protein-like<br>( <i>Cannabis sativa</i> ) | 1  | 1 | K.SQNEEYFFPGPR.S                                                                                                                                                                                   | 55771 |
| <b>D1</b> | XP_030508280.1 | Vicilin C72-like<br>( <i>Cannabis sativa</i> )             | 19 | 7 | R.TVGFVGNAR.N;<br>K.FYEVTPEQNK.Q;<br>K.TTVLVMVVEGTGR.M + Oxidation (M);<br>K.LSYFVSQQQEEGR.G;<br>R.GHESSGPVISLQNSPR.Y;<br>R.ADVIVVPAGSTVYMTNQDNK.E;<br>K.EAQELAFNMQGSEVEQIFNQPK.L + Oxidation (M)  | 99860 |
| <b>D1</b> | CDP79023.1     | Edestin 1<br>( <i>Cannabis sativa</i> )                    | 10 | 7 | K.GTLDLVSPLR.S;<br>K.TNDNAWVSPLAGR.T;<br>R.GQGQGSQGSQPDR.H;<br>R.LQGQNDDRNSIIR.V + 2 Deamidated (NQ);<br>R.YLEEAFNVDSSETVK.R + Deamidated (NQ);<br>R.YLEEAFNVDSSETVKR.L;<br>R.GILGVTFPGCPETFESQR.G | 58810 |
| <b>D1</b> | XP_030493178.1 | Sucrose-binding protein-like<br>( <i>Cannabis sativa</i> ) | 8  | 5 | K.ELAFSVPAR.E;<br>R.SSGPFNLFR.D;<br>K.LINPVSLPGR.F;<br>K.SQNEEYFFPGPR.S;<br>R.FEPFYGAGGENPESFYK.A                                                                                                  | 55771 |
| <b>D1</b> | CDP79028.1     | Edestin 2<br>( <i>Cannabis sativa</i> )                    | 2  | 2 | R.GEDLQIAPSR.I;<br>R.AMPDDVLANAFQISR.E + Oxidation (M)                                                                                                                                             | 56277 |

|           |            |                                                                          |    |   |                                                                                                                                                                                                                             |       |
|-----------|------------|--------------------------------------------------------------------------|----|---|-----------------------------------------------------------------------------------------------------------------------------------------------------------------------------------------------------------------------------|-------|
| <b>E1</b> | AAO45103.1 | Beta-conglycinin<br>alpha' subunit,<br>partial<br>( <i>Glycine max</i> ) | 4  | 4 | R.LQESVIVEISK;<br>R.LQESVIVEISK <sub>e</sub> QIR.A;<br>NILEASYDTKFEEINK.V;<br>R.FESFFLSSTQAQQSYLQGFSK.N                                                                                                                     | 44991 |
| <b>E1</b> | CDP79023.1 | Edestin 1<br>( <i>Cannabis sativa</i> )                                  | 3  | 3 | K.TNDNAWVSPLAGR.T;<br>R.GQGQGSQGSQPDR.H;<br>R.GILGVTFPGCPETFEEISR.G                                                                                                                                                         | 58810 |
| <b>E1</b> | CDP79027.1 | Edestin 2<br>( <i>Cannabis sativa</i> )                                  | 4  | 2 | R.GEDLQIIAPSR.I;<br>R.ESGEQTPNGNIFSGFDTR.I;                                                                                                                                                                                 | 56338 |
| <b>E1</b> | KHN10743.1 | Glycinin G2<br>( <i>Glycine soja</i> )                                   | 2  | 2 | K.SQSDNFEYVSFK.T;<br>R.RFYLAGNQEQLK.Y                                                                                                                                                                                       | 59640 |
| <b>E2</b> | SNQ45160.1 | Edestin 3<br>( <i>Cannabis sativa</i> )                                  | 26 | 8 | K.IQSQDDFR.G;<br>K.QQEGLPNNVFR.G;<br>R.TAVYGDQNECQLNR.L;<br>R.FYIAGNPHEDFPQSR.R;<br>R.IEEEEKQEGLPNNVFR.G;<br>R.GFSVNLIQEAFNVDSETAR.K;<br>R.GVLGTLFPGCAETFEEAQVSVGGGR.S;<br>R.VECEGMIESWNPHEQFQCAGVALLR.L +<br>Oxidation (M) | 56473 |
| <b>E2</b> | CDP79028.1 | edestin 2<br>( <i>Cannabis sativa</i> )                                  | 21 | 9 | R.GEDLQIIAPSR.I;<br>R.WSQCQFQR.L;<br>R.VRGEDLQIIAPSR.I;<br>R.AMPDDVLANAFQISR.E + Oxidation (M);<br>R.ILAESFNVDTELAHK.L;<br>R.GIHGAVIPGCPETFEEISR.G;<br>R.ESGEQTPNGNIFSGFDTR.I;                                              | 56277 |

|           |                |                                                                                     |    |   |                                                                                                                                                                              |       |
|-----------|----------------|-------------------------------------------------------------------------------------|----|---|------------------------------------------------------------------------------------------------------------------------------------------------------------------------------|-------|
| <b>E2</b> | XP_030506286.1 | NADPH-dependent aldehyde reductase 1, chloroplastic-like ( <i>Cannabis sativa</i> ) | 1  | 1 | R.VECEAGVSEYWDIQNTEDDELHCAGVETAR.<br>H<br>K.IALVSGGDSGIGR.A                                                                                                                  | 32167 |
| <b>E3</b> | CDP79023.1     | edestin 1 ( <i>Cannabis sativa</i> )                                                | 8  | 7 | K.GTLDLVSPLR.S;<br>K.TNDNAWVSPLAGR.T;<br>R.EETVLLTSSSTSSR.R;<br>R.GQGQGSQGSQPDR.H;<br>K.QASSDGFVVSFK.T;<br>R.YLEEAFNVDSSETVK.R+ Deamidated (NQ);<br>R.GILGVTFPGCPETFEESSQR.G | 58810 |
| <b>E3</b> | SNQ45153.2     | 7S vicilin-like protein ( <i>Cannabis sativa</i> )                                  | 3  | 3 | K.EGDVFWVPR.Y;<br>K.SPDSYNLYDGK.K;<br>R.ESVILPTSAASPPVK.L                                                                                                                    | 56026 |
| <b>E3</b> | CDP79028.1     | edestin 2 ( <i>Cannabis sativa</i> )                                                | 2  | 2 | R.LQVVDDNGR.N;<br>R.AMPDDVLANAFQISR.E + Oxidation (M)                                                                                                                        | 56277 |
| <b>F1</b> | CDP79023.1     | Edestin 1 ( <i>Cannabis sativa</i> )                                                | 7  | 5 | K.GTLDLVSPLR.S;<br>K.TNDNAWVSPLAGR.T + Deamidated (NQ);<br>R.GQGQGSQGSQPDR.H;<br>R.YLEEAFNVDSSETVK.R + Deamidated (NQ);<br>R.GILGVTFPGCPETFEESSQR.G                          | 58810 |
| <b>F1</b> | CDP79027.1     | Edestin 2 ( <i>Cannabis sativa</i> )                                                | 5  | 2 | R.GEDLQIIAPSR.I;<br>R.ESGEQTPNGNIFSGFDTR.I                                                                                                                                   | 56338 |
| <b>F2</b> | XP_030508280.1 | vicilin C72-like ( <i>Cannabis sativa</i> )                                         | 73 | 9 | K.ESLQIVK.L;<br>R.TVGFGVNAR.N;<br>K.FYEVTPQNK.Q;                                                                                                                             | 99860 |

|           |            |                                         |    |    |                                                                                                                                                                                                                                                                                       |       |
|-----------|------------|-----------------------------------------|----|----|---------------------------------------------------------------------------------------------------------------------------------------------------------------------------------------------------------------------------------------------------------------------------------------|-------|
|           |            |                                         |    |    | K.TTVLVMVVEGTGR.M;<br>K.LSYFVSQQQEEGR.G;<br>R.GHESSGPVISLQNQSPR.Y;<br>R.ADVIVVPAGSTVYMTNQDNK.E;<br>K.EAQELAFNMQGSEVEQIFNQPK.L;<br>R.VTAQLSPGDVFIIPAGHPVAVVANNNQK.L +<br>Deamidated (NQ)                                                                                               |       |
| <b>F2</b> | CDP79023.1 | Edestin 1<br>( <i>Cannabis sativa</i> ) | 32 | 12 | R.LQGQNDDR + Deamidated (NQ);<br>R.GQGQGSQGSQPDR.H;<br>K.GTLDLVSPLR.S;<br>R.QQNQCQIDR.I;<br>K.TNDNAWVSPLAGR.T;<br>R.EETVLLTSSTSSR.R;<br>R.GQGQGSQGSQPDR.H;<br>R.LQGQNDDRNSIIR.V;<br>R.YLEEAFNVDSSETVK.R;<br>R.YLEEAFNVDSSETVKR.L;<br>R.FYLAGNPEDEFELRR.E;<br>R.GILGVTFPGCPETFEESSQR.G | 58810 |
| <b>F2</b> | SNQ45160.1 | Edestin 3<br>( <i>Cannabis sativa</i> ) | 26 | 5  | K.QQEGLPNNVFR.G ;<br>R.TAVYGDQNECQLNR.L;<br>R.IIEEKQQEGLPNNVFR.G;<br>R.GFSVNLIQEAFNVDSSETVAR.K;<br>R.GVLGTLFPGCAETFEEAQVSVGGGR.S                                                                                                                                                      | 56473 |
| <b>F2</b> | CDP79028.1 | Edestin 2<br>( <i>Cannabis sativa</i> ) | 29 | 8  | R.GEDLQIIAPSR.I;<br>R.WQSQCQFQR.L;<br>R.RESGEQTPNGNIFSGFDTR.I;<br>R.VRGEDLQIIAPSR.I;<br>R.AMPDDVLANAFQISR.E + Oxidation (M);<br>R.ILAESFNVDTELAHK.L;<br>R.GIHGAVIPGCPETFERR.G;<br>R.ESGEQTPNGNIFSGFDTR.I                                                                              | 56277 |

|           |                |                                                                                         |    |    |                                                                                                                                                                                                                                                                                                                                                                                     |       |
|-----------|----------------|-----------------------------------------------------------------------------------------|----|----|-------------------------------------------------------------------------------------------------------------------------------------------------------------------------------------------------------------------------------------------------------------------------------------------------------------------------------------------------------------------------------------|-------|
| <b>F2</b> | XP_030493178.1 | Sucrose-binding protein-like<br>( <i>Cannabis sativa</i> )                              | 12 | 5  | K.ELAFSVPAR.E;<br>K.LINPVSLPGR.F;<br>K.SQNEEYFFPGPR.S;<br>R.ETFNLVEGDILNIPAGTPVYIVNR.D;<br>R.FEFPYGAGGENPESFYK.A                                                                                                                                                                                                                                                                    | 55771 |
| <b>F2</b> | XP_030506286.1 | NADPH-dependent aldehyde reductase 1, chloroplastic-like.<br>( <i>Cannabis sativa</i> ) | 1  | 1  | K.IALVSGGDSGIGR.A                                                                                                                                                                                                                                                                                                                                                                   | 32167 |
| <b>G1</b> | SNQ45160.1     | Edestin 3 ( <i>C. sativa</i> )                                                          | 41 | 10 | K.LDLVKPQR.S;<br>R.KIQSQDDFR.G;<br>K.QQEGLPNNVFR.G;<br>R.TAVYGDQNECQLNR.L;<br>R.AMPEDVIANSYQISR.E + Oxidation (M);<br>R.FYIAGNPHEDFPQSR.R;<br>R.IEEEEKEQGLPNNVFR.G;<br>R.GFSVNLIQEAFNVDSETAR.K;<br>R.GVLGTLFPGCAETFEEAQVSVGGGR.S;<br>R.VECEGMIESWNPHEQFQCAGVALLR.L + Oxidation (M);                                                                                                 | 56473 |
| <b>G1</b> | CDP79023.1     | Edestin 1 ( <i>Cannabis sativa</i> )                                                    | 39 | 15 | K.GTLDLVSPLR.S;<br>R.QQNQCQIDR.I;<br>R.VKGTLDLVSPLR.S;<br>K.TNDNAWVSPLAGR.T;<br>R.GQGQGSQGSQPDR.H;<br>R.ISTVNSYNLPILR.F;<br>R.LQGQNDDRNSIIR.V;<br>R.ALPEAVLANAFQISR.D;<br>R.YLEEA FNVDSETVK.R + Deamidated (NQ);<br>R.FYLAGNPEDEFEQLR.R;<br>R.YTIQQNGLHLPSYTNTQPQLVYIVK + 2 Deamidated (NQ);<br>R.FYLAGNPEDEFEQLRR.E;<br>R.VEAEAGLIESWNPNHNFQCAGVAVVR.Y;<br>R.GILGVTFPGCPETFEEQR.G; | 58810 |

|           |                |                                                                                              |    |    |                                                                                                                                                                                                                                                        |       |
|-----------|----------------|----------------------------------------------------------------------------------------------|----|----|--------------------------------------------------------------------------------------------------------------------------------------------------------------------------------------------------------------------------------------------------------|-------|
|           |                |                                                                                              |    |    | R.YTIQQNGLHLPSYTNTTPQLVYIVK.G +<br>Deamidated (NQ);                                                                                                                                                                                                    |       |
| <b>G1</b> | CDP79028.1     | Edestin 2<br>( <i>Cannabis sativa</i> )                                                      | 26 | 10 | R.GEDLQIIAPSR.I;<br>K.ASAQGFEWIAVK.T;<br>R.VRGEDLQIIAPSR.I;<br>R.LNTLNYYNLPILR.F;<br>R.AMPDDVLANAFQISR.E + Oxidation (M);<br>R.ILAESFNVDTELAHK.L;<br>R.GIHGAVIPGCPETFER.G;<br>R.ESGEQTPNGNIFSGFDTR.I;<br>R.GLLLPSFLNAPMMFYVIQGR.G + 2 Oxidation<br>(M) | 56277 |
| <b>G1</b> | SNQ45153.2     | 7S vicilin-like<br>protein<br>( <i>Cannabis sativa</i> )                                     | 4  | 4  | K.ATEYGIIK.K.G;<br>K.eGDVFWVPR.Y;<br>R.ESVILPTSAASPPVK.L;<br>R.AGPMEFFGFTTSAR.K + Oxidation (M)                                                                                                                                                        | 56026 |
| <b>G1</b> | XP_030506286.1 | NADPH-dependent<br>aldehyde reductase<br>1, chloroplastic-like<br>( <i>Cannabis sativa</i> ) | 1  | 1  | K.IALVSGGDSGIGR.A                                                                                                                                                                                                                                      | 32167 |
| <b>H1</b> | CDP79023.1     | Edestin 1<br>( <i>Cannabis sativa</i> )                                                      | 2  | 2  | K.TNDNAWVSPLAGR.T;<br>R.GQGQGSQGSQPDR.H                                                                                                                                                                                                                | 58810 |
| <b>H1</b> | SNQ45158.1     | Edestin 3<br>( <i>Cannabis sativa</i> )                                                      | 1  | 1  | K.EQEGLPNNVFR.G                                                                                                                                                                                                                                        | 56672 |
| <b>H2</b> | CDP79023.1     | Edestin 1 ( <i>Cannabis<br/>sativa</i> )                                                     | 3  | 3  | K.TNDNAWVSPLAGR.T;<br>R.EETVLLTSSTSSR.R;<br>R.GQGQGSQGSQPDR.H                                                                                                                                                                                          | 58810 |

|           |                |                                                            |    |    |                                                                                                                                                                                                                                    |       |
|-----------|----------------|------------------------------------------------------------|----|----|------------------------------------------------------------------------------------------------------------------------------------------------------------------------------------------------------------------------------------|-------|
| <b>H2</b> | SNQ45153.2     | 7S vicilin-like protein<br>( <i>Cannabis sativa</i> )      | 3  | 3  | K.ATEYGILK.G;<br>K.EGDVFWVPR.Y;<br>K.SPDSYNLYDGK.K                                                                                                                                                                                 | 56016 |
| <b>H2</b> | CDP79027.1     | Edestin 2 ( <i>Cannabis sativa</i> )                       | 1  | 1  | R.GEDLQIIAPSR.I                                                                                                                                                                                                                    | 56338 |
| <b>I1</b> | SNQ45158.1     | Edestin 3 ( <i>Cannabis sativa</i> )                       | 3  | 2  | R.GFSVNLIQEAFNVDSETAR.K;<br>R.GVLGTLFPGCAETFEEAQVSVGGGR.S                                                                                                                                                                          | 56672 |
| <b>I1</b> | CDP79023.1     | Edestin 1 ( <i>Cannabis sativa</i> )                       | 3  | 3  | R.QQNQCQIDR.I;<br>R.GQGQGSQGSQPDR.H;<br>R.GILGVTFPGCPETFEEESQR.G                                                                                                                                                                   | 58810 |
| <b>I2</b> | CDP79023.1     | Edestin 1 ( <i>Cannabis sativa</i> )                       | 12 | 10 | K.GTLDLVSPLR.S;<br>R.QQNQCQIDR.I;<br>K.TNDNAWVSPLAGR.T;<br>R.GQGQGSQGSQPDR.H;<br>R.LQGQNDDRNSIIR.V;<br>R.YLEEAFNVDSETVK.R;<br>R.FYLAGNPEDEFELR.R;<br>R.GILGVTFPGCPETFEEESQR.G;<br>R.YTIQQNGLHLPSYTNTPLVYIVK + 2<br>Deamidated (NQ) | 58810 |
| <b>I2</b> | XP_030508280.1 | vicilin C72-like<br>( <i>Cannabis sativa</i> )             | 6  | 3  | K.FYEVTPEQNK.Q;<br>K.TTVLVMVVEGTGR.M;<br>R.ADVIVVPAGSTVYMTNQDNK.E;                                                                                                                                                                 | 99860 |
| <b>I2</b> | XP_030493178.1 | sucrose-binding protein-like<br>( <i>Cannabis sativa</i> ) | 2  | 2  | K.ELAFSVPAR.E;<br>K.SQNEEYFFPGPR.S                                                                                                                                                                                                 | 55771 |

|           |                |                                                               |    |    |                                                                                                                                                                                                                                                |       |
|-----------|----------------|---------------------------------------------------------------|----|----|------------------------------------------------------------------------------------------------------------------------------------------------------------------------------------------------------------------------------------------------|-------|
| <b>I3</b> | XP_030508280.1 | vicilin C72-like<br>( <i>Cannabis sativa</i> )                | 21 | 7  | K.ESLQIVK;<br>R.TVGFGVNAR.N;<br>K.FYEVTPEQNK.Q;<br>K.TTVLVMVVEGTGR.M;<br>K.LSYFVSQQQEEGR.G;<br>R.ADVIVVPAGSTVYMTNQDNK.E;<br>K.EAQELAFNMQGSEVEQIFNQPK.L + Oxidation<br>(M)                                                                      | 99860 |
| <b>I3</b> | CDP79023.1     | Edestin 1 ( <i>Cannabis sativa</i> )                          | 8  | 5  | K.TNDNAWVSPLAGR.T;<br>R.GQGQGSQGSQPDR.H;<br>K.QASSDGFVVSFK.T;<br>R.YLEEA FNVDSE TVK.R;<br>R.GILGVTFPGCPETFEE SQR.G                                                                                                                             | 58810 |
| <b>I3</b> | XP_030493178.1 | sucrose-binding<br>protein-like<br>( <i>Cannabis sativa</i> ) | 6  | 3  | K.ELAFSVPAR.E;<br>K.LINPVSLPGR.F;<br>K.SQNEEYFFPGPR.S                                                                                                                                                                                          | 55771 |
| <b>I3</b> | SNQ45160.1     | Edestin 3 ( <i>Cannabis sativa</i> )                          | 2  | 2  | K.QQEGLPNNVFR.G;<br>K.QQEGLPNNVFR                                                                                                                                                                                                              | 56473 |
| <b>I4</b> | CDP79028.1     | Edestin 2 ( <i>Cannabis sativa</i> )                          | 33 | 10 | R.LQVVDDNGR.N;<br>R.GEDLQIIAPSR.I;<br>R.WQSQCQFQR.L;<br>K.ASAQGFEWIAVK.T;<br>R.AMPDDVLANAFQISR.E + Oxidation (M);<br>R.ILAESFNVDTELAHK.L;<br>R.GIHGAVIPGCPETFER.G;<br>R.ESGEQTPNGNIFSGFDTR.I;<br>R.GLLLPSFLNAPMMFYVIQGR.G + 2 Oxidation<br>(M) | 56277 |

|           |            |                                                           |    |    |                                                                                                                                                                                                                                                               |       |
|-----------|------------|-----------------------------------------------------------|----|----|---------------------------------------------------------------------------------------------------------------------------------------------------------------------------------------------------------------------------------------------------------------|-------|
| <b>I4</b> | CDP79023.1 | Edestin 1 ( <i>Cannabis sativa</i> )                      | 15 | 9  | R.ADVFTPQAGR.I;<br>K.TNDNAWVSPLAGR.T;<br>R.EETVLLTSSTSSR.R;<br>K.QASSDGFVWVSFK.T;<br>R.ISTVNSYNLPILR.F;<br>R.ALPEAVLANAFQISR.D;<br>R.YLEEA FNVDSE TVK.R;<br>R.FYLAGNPEDEFEQLR.R;<br>R.GILGVTFPGCPETFEEQR.G                                                    | 58810 |
| <b>I4</b> | SNQ45160.1 | Edestin 3 ( <i>Cannabis sativa</i> )                      | 6  | 4  | K.QQEGLPNNVFR.G;<br>R.IEEEEKQQEGLPNNVFR.G;<br>R.GFSVNLIQEAFNVDSETAR.K;<br>R.GVLGTLFPGCAETFEEAQVSVGGGR.S                                                                                                                                                       | 56473 |
| <b>I4</b> | SNQ45153.2 | 7S vicilin-like protein ( <i>Cannabis sativa</i> )        | 7  | 4  | K.ATEYGILK.G;<br>K.EGDVFWVPR.Y;<br>K.SPDSYNLYDGK.K;<br>R.YFPFCQIASR.A                                                                                                                                                                                         | 56026 |
| <b>I4</b> | BAK03519.1 | Predicted protein ( <i>Hordeum vulgare</i> subs. Vulgare) | 2  | 2  | R.LIGQIVSSITASLR.F                                                                                                                                                                                                                                            | 50667 |
| <b>I5</b> | CDP79023.1 | edestin 1 ( <i>Cannabis sativa</i> )                      | 86 | 18 | K.GTLDLVSPLR.S;<br>R.QQNQCQIDR.I;<br>R.VKGTLDLVSPLR.S;<br>K.TNDNAWVSPLAGR.T;<br>R.EETVLLTSSTSSR.R;<br>R.GQGQGSQGSQPDR.H;<br>R.LQGQNDDRNSIIR.V + Deamidated (NQ);<br>R.ALPEAVLANAFQISR.D;<br>R.YLEEA FNVDSE TVKR.L;<br>R.YLEEA FNVDSE TVK.R + Deamidated (NQ); | 58810 |

|           |                |                                                                                              |    |    |                                                                                                                                                                                                                                                                                                                                                                                                                                                                                                                                |       |
|-----------|----------------|----------------------------------------------------------------------------------------------|----|----|--------------------------------------------------------------------------------------------------------------------------------------------------------------------------------------------------------------------------------------------------------------------------------------------------------------------------------------------------------------------------------------------------------------------------------------------------------------------------------------------------------------------------------|-------|
| <b>I5</b> | CDP79028.1     | edestin 2 ( <i>Cannabis sativa</i> )                                                         | 58 | 14 | R.FYLAGNPEDEFEQLRR.E;<br>R.VEAEAGLIESWNPNNHNFQCAGVAVVR.Y;<br>R.GILGVTFPGCPETFEEQR.G;<br>R.YTIQQNGLHLPSYTNTPLVYIVK.G +<br>Deamidated (NQ);<br>R.LQVVDDNGR.N;<br>R.GEDLQIIAPSR.I;<br>R.WQSQCQFQR.L;<br>K.ASAQGFEWIAVK.T;<br>R.VRGEDLQIIAPSR.I;<br>R.LNTLNLYNLPILR.F;<br>R.AMPDDVLANAFQISR.E + Oxidation (M);<br>R.ILAESFNVDTELAHK.L;<br>R.GIHGAVIPGCPETFERR.G;<br>R.QNIDRPSQADIFNPR.G + Deamidated (NQ);<br>R.RESGEQTPNGNIFSGFDTR.I;<br>R.GLLLPSFLNAPMMFYVIQGR.G + 2 Oxidation<br>(M);<br>R.VECEAGVSEYWDIQNTEDDELHCAGVETAR.<br>H | 56227 |
| <b>I5</b> | XP_004232705.1 | Lactoylglutathione<br>lyase GLX1<br>( <i>Solanum lycopersicum</i> )                          | 5  | 3  | K.ITSFLDPDGWK.T<br>K.DPDGYLFEIIQR.E<br>K.GNAYAQIAIGTDDVYK.S                                                                                                                                                                                                                                                                                                                                                                                                                                                                    | 32972 |
| <b>I5</b> | XP_030506286.1 | NADPH-dependent<br>aldehyde reductase<br>1, chloroplastic-like<br>( <i>Cannabis sativa</i> ) | 5  | 3  | K.LLDYTATK.G<br>K.IALVSGGDSGIGR.A<br>K.EGSCVINTTSVNAYK.G                                                                                                                                                                                                                                                                                                                                                                                                                                                                       | 32167 |
| <b>I5</b> | XP_030508280.1 | vicilin C72-like<br>( <i>Cannabis sativa</i> )                                               | 2  | 2  | K.FYEVTPEQNK.Q<br>K.LSYFVSQQQEEGR.G                                                                                                                                                                                                                                                                                                                                                                                                                                                                                            | 99860 |

|           |                |                                                            |    |   |                                                                                                                                                                                                                     |       |
|-----------|----------------|------------------------------------------------------------|----|---|---------------------------------------------------------------------------------------------------------------------------------------------------------------------------------------------------------------------|-------|
| <b>I5</b> | XP_030493178.1 | sucrose-binding protein-like<br>( <i>Cannabis sativa</i> ) | 3  | 3 | K.ELAFSVPAR.E<br>K.LINPVSLPGR.F<br>R.FEPFYGAGGENPESFYK.A                                                                                                                                                            | 55771 |
| <b>I6</b> | XP_030508280.1 | vicilin C72-like<br>( <i>Cannabis sativa</i> )             | 29 | 8 | K.ESLQIVK;<br>R.TVGFGVNAR.N + Deamidated (NQ);<br>K.FYEVTPEQNK.Q;<br>K.TTVLVMVVEGTGR.M;<br>K.LSYFVSQQQEEGR.G;<br>K.EAQELAFNMQGSEVEQIFNQPK.L + Oxidation (M);<br>R.GHESSGPVISLQNQSPR.Y;<br>R.ADVIVVPAGSTVYMTNQDNK.E; | 99860 |
| <b>I6</b> | XP_030493178.1 | sucrose-binding protein-like<br>( <i>Cannabis sativa</i> ) | 11 | 4 | K.ELAFSVPAR.E;<br>K.LINPVSLPGR.F;<br>K.SQNEEYFFPGPR.S;<br>R.FEPFYGAGGENPESFYK.A                                                                                                                                     | 55771 |
| <b>I6</b> | CDP79023.1     | edestin 1<br>( <i>Cannabis sativa</i> )                    | 8  | 5 | K.GTLDLVSPLR.S;<br>K.TNDNAWVSPLAGR.T;<br>R.GQGQGSQGSQPDR.H;<br>K.QASSDGFVVSFK.T;<br>R.ISTVNSYNLPILR.F + Deamidated (NQ)                                                                                             | 58810 |
| <b>I6</b> | SNQ45153.2     | 7S vicilin-like protein<br>( <i>Cannabis sativa</i> )      | 5  | 3 | K.EGDVFWVPR.Y;<br>R.ISAGSAFYiVNTGEGQR;<br>K.EILSSQEGPIVYIPDSR.S;                                                                                                                                                    | 56026 |
| <b>I6</b> | CDP79028.1     | edestin 2<br>( <i>Cannabis sativa</i> )                    | 1  | 1 | R.AMPDDVLANAFQISR.E                                                                                                                                                                                                 | 56277 |
| <b>L1</b> | CDP79023.1     | edestin 1<br>( <i>Cannabis sativa</i> )                    | 18 | 7 | R.ENIGDPSR.A;<br>R.FLQLSAER.G;<br>R.ADVFTPQAGR.I;                                                                                                                                                                   | 58810 |

|           |            |                                         |    |   |                                                                                       |       |
|-----------|------------|-----------------------------------------|----|---|---------------------------------------------------------------------------------------|-------|
|           |            |                                         |    |   | K.TNDNAWVSPLAGR.T;<br>R.EETVLLTSSTSSR.R;<br>K.QASSDGF EWVSFK.T;<br>R.ISTVNSYNLPILR.F; |       |
| <b>L2</b> | CDP79023.1 | edestin 1<br>( <i>Cannabis sativa</i> ) | 4  | 2 | K.TNDNAWVSPLAGR.T R.EETVLLTSSTSSR.R                                                   | 58810 |
| <b>L2</b> | SNQ45158.1 | edestin 3<br>( <i>Cannabis sativa</i> ) | 4  | 3 | R.ADV FSPQAGR.L<br>R.CQVVDNNGR.S<br>R.AMPEDVIANSYQISR.E                               | 56672 |
| <b>L3</b> | SNQ45158.1 | edestin 3<br>( <i>Cannabis sativa</i> ) | 8  | 4 | R.ESMGD PAR.A<br>R.ADV FSPQAGR.L<br>R.QGQALTVPQNF AVVK.M<br>R.AMPEDVIANSYQISR.E       | 56672 |
| <b>L3</b> | CDP79023.1 | edestin 1<br>( <i>Cannabis sativa</i> ) | 3  | 1 | K.TNDNAWVSPLAGR.T                                                                     | 58810 |
| <b>L4</b> | CDP79028.1 | edestin 2<br>( <i>Cannabis sativa</i> ) | 11 | 5 | R.LQVVDNNGR.N<br>R.AMPDDVL ANAFQISR.E<br>K.ASAQGF EWIAVK.T<br>K.TNDNAMRNPLAGK.V       | 56227 |
| <b>L4</b> | SNQ45158.1 | edestin 3<br>( <i>Cannabis sativa</i> ) | 4  | 4 | R.AQVNQLAGK<br>R.ADV FSPQAGR.L<br>R.CQVVDNNGR.S<br>R.AMPEDVIANSYQISR.E                | 56672 |
| <b>L4</b> | CDP79023.1 | edestin 1<br>( <i>Cannabis sativa</i> ) | 2  | 1 | K.TNDNAWVSPLAGR.T                                                                     | 58810 |
| <b>L5</b> | CDP79023.1 | edestin 1<br>( <i>Cannabis sativa</i> ) | 3  | 1 | K.TNDNAWVSPLAGR.T;                                                                    | 58810 |

|           |            |                                         |   |   |                                                                                            |       |
|-----------|------------|-----------------------------------------|---|---|--------------------------------------------------------------------------------------------|-------|
| <b>L5</b> | CDP79028.1 | edestin 2<br>( <i>Cannabis sativa</i> ) | 6 | 2 | R.LQVVDDNGR.N + Deamidated (NQ);<br>R.AMPDDVLANAFQISR.E + Oxidation (M)                    | 56277 |
| <b>L5</b> | SNQ45158.1 | edestin 3<br>( <i>Cannabis sativa</i> ) | 4 | 3 | R.ADVFSPQAGR.L;<br>R.CQVVDNNGR.S + Deamidated (NQ);<br>R.AMPEDVIANSYQISR.E + Oxidation (M) | 56672 |

---

**Table S3.** Spots with differential abundance from total protein extracts of Futura75 and Finola hemp seeds analyzed by 2D-PAGE. Spot number, ANOVA statistic parameters and samples showing changes in spot intensity are indicated.

| <b>Spot</b> | <b>Df</b> | <b>F</b> | <b>p-value</b> | <b>Differential expression</b>                |
|-------------|-----------|----------|----------------|-----------------------------------------------|
| <b>9</b>    | 3         | 6,11004  | <0,05          | (+) Fin Vig vs Fin Cert                       |
| <b>12</b>   | 3         | 8,57694  | <0,005         | (+) Fin Vig                                   |
| <b>13</b>   | 3         | 4,41576  | <0,05          | (+) Fin Cert vs Fut Cert                      |
| <b>22</b>   | 3         | 23,11334 | <0,001         | (+) Fin Vig                                   |
| <b>23</b>   | 3         | 17,51602 | <0,001         | (+) Fin Vig                                   |
| <b>33</b>   | 3         | 4,49596  | <0,05          | (+) Fin Vig vs Fut Vig                        |
| <b>38</b>   | 3         | 12,7898  | <0,001         | (+) Fin Vig                                   |
| <b>39</b>   | 3         | 13,73631 | <0,001         | (+) Fin Vig                                   |
| <b>41</b>   | 3         | 96,43931 | <0,001         | (+) Fin Vig                                   |
| <b>42</b>   | 3         | 22,29541 | <0,001         | (+) Fin Vig, (-) Fut Vig vs Fin Vig, Fin Cert |
| <b>49</b>   | 3         | 81,99251 | <0,001         | (+) Fin Vig                                   |
| <b>56</b>   | 3         | 7,99074  | <0,005         | (+) Fin Cert vs Fut Vig, Fin Vig              |
| <b>71</b>   | 3         | 5,18847  | <0,05          | (-) Fin Vig vs Fut Vig                        |
| <b>72</b>   | 3         | 8,12546  | <0,001         | (+) FinCert                                   |
| <b>73</b>   | 3         | 27,82664 | <0,001         | (-) Fin Vig, (+) Fin Cert                     |
| <b>74</b>   | 3         | 7,52056  | <0,005         | (-) Fin Vig vs FinCert                        |
| <b>75</b>   | 3         | 22,68718 | <0,001         | (-) Fin Vig                                   |
| <b>76</b>   | 3         | 20,31859 | <0,001         | (-) Fin Vig                                   |
| <b>80</b>   | 3         | 15,09476 | <0,001         | (+) Fin Cert, (+) Fut Cert vs Fin Vig         |
